# Supplementary material for: Ultrafine and Fine Particulate Matter Inside and Outside of Mechanically Ventilated Buildings
Source: PubMed Central journal article supplement (PMC5334682; doi:10.3390/ijerph14020128), 2017-01-28
Supplement: ijerph-14-00128-s001.pdf [file ijerph-14-00128-s001.pdf]

# Supplementary Materials: Ultrafine and Fine Particulate Matter inside and outside of Mechanically Ventilated Buildings

Shelly L. Miller, Nick A. Facciola, Darin Toohey and John Zhai

## 1. Section A: Indoor and Outdoor UHSAS Number Concentration Plots

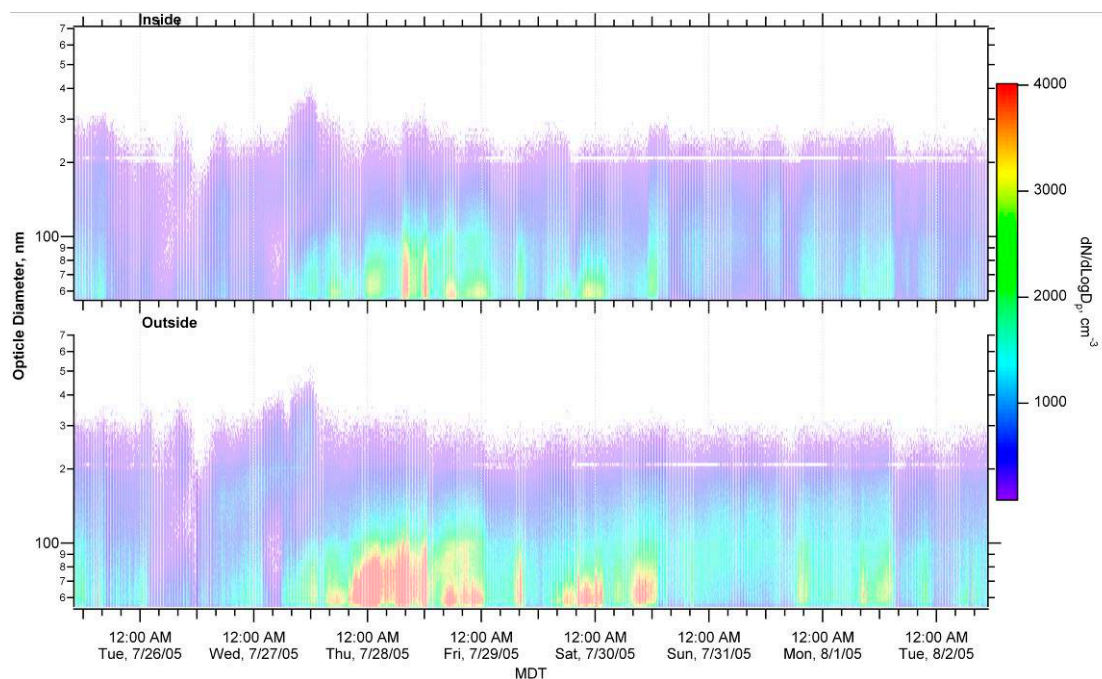

Figure S1. Summer 2005: University Building, Boulder.

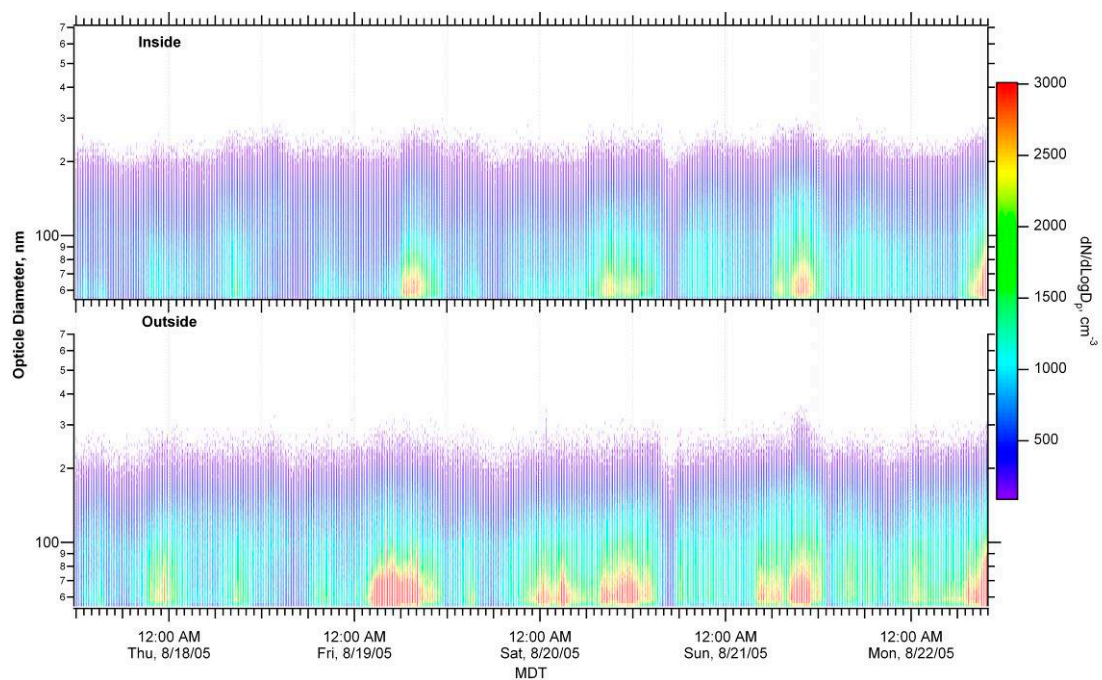

Figure S2. Summer 2005: Denver School.

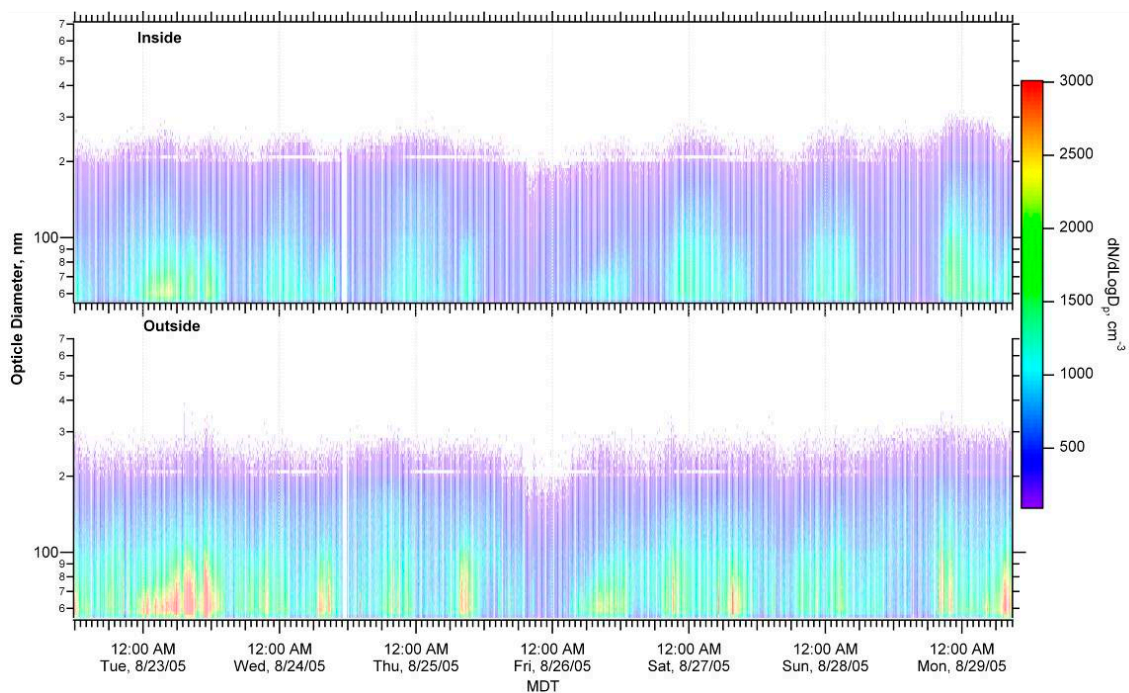

Figure S3. Summer 2005: Office building, Denver.

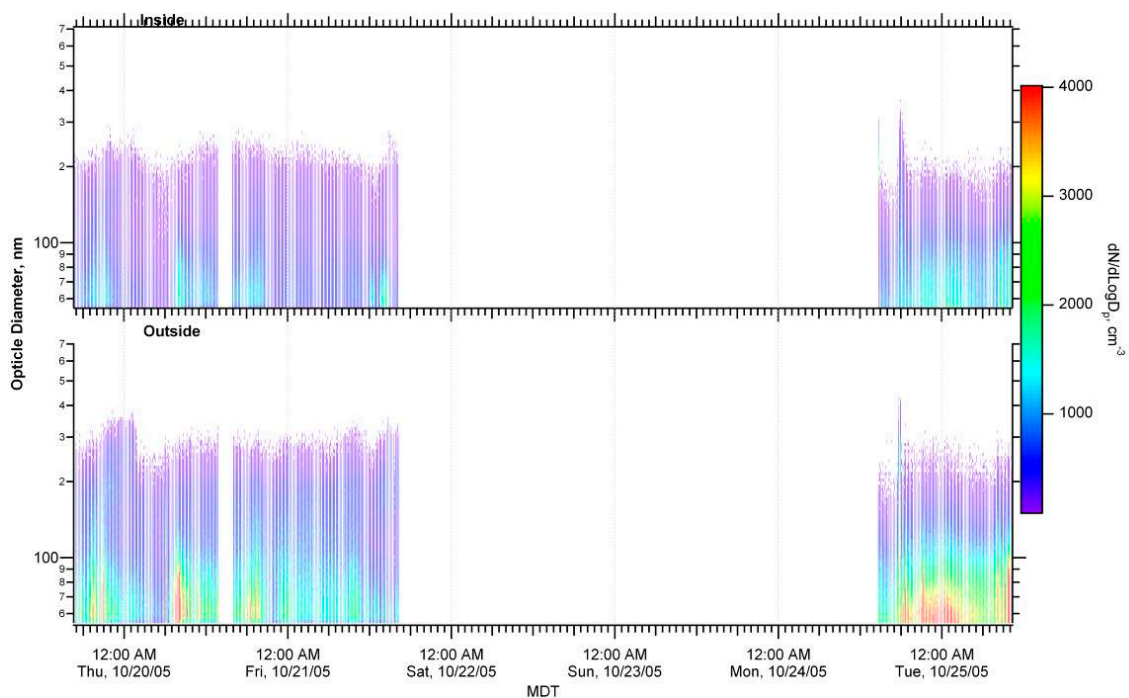

Figure S4. Fall 2005: University Building, Boulder.

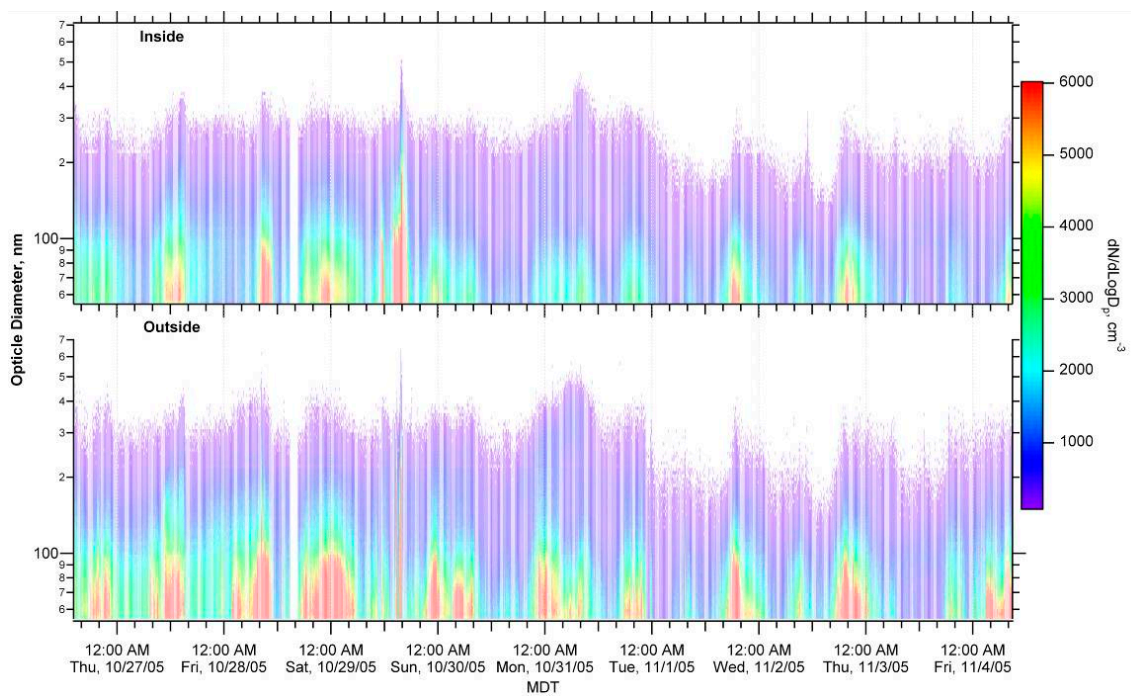

Figure S5. Fall 2005: Denver School.

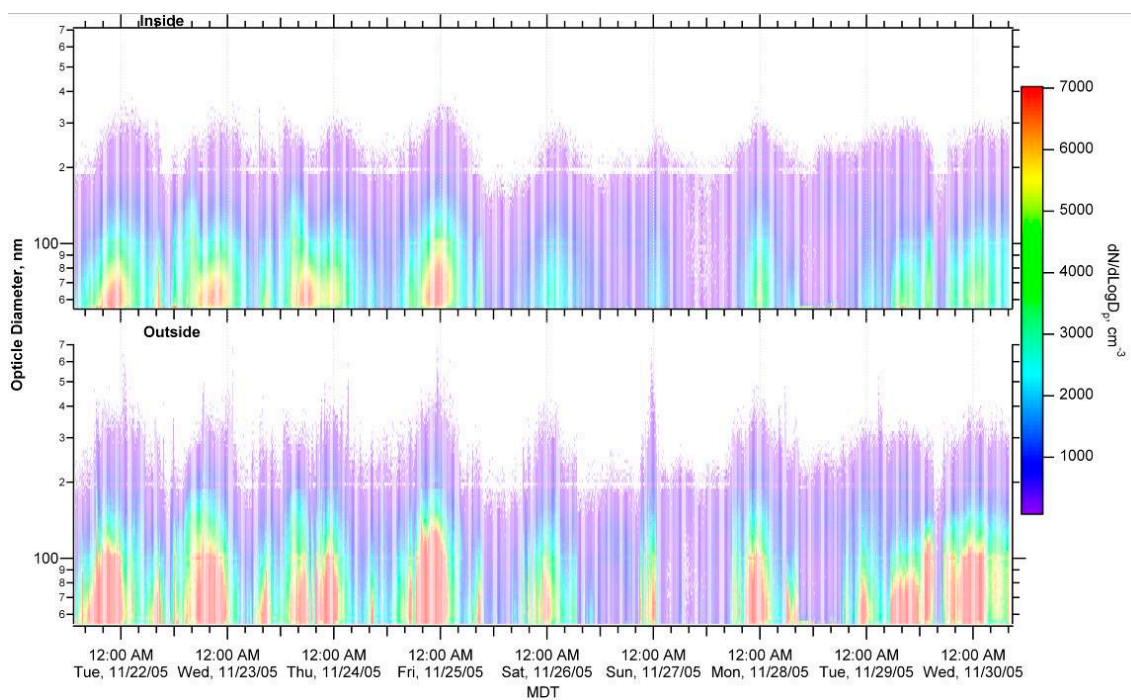

Figure S6. Fall 2005: Boulder School.



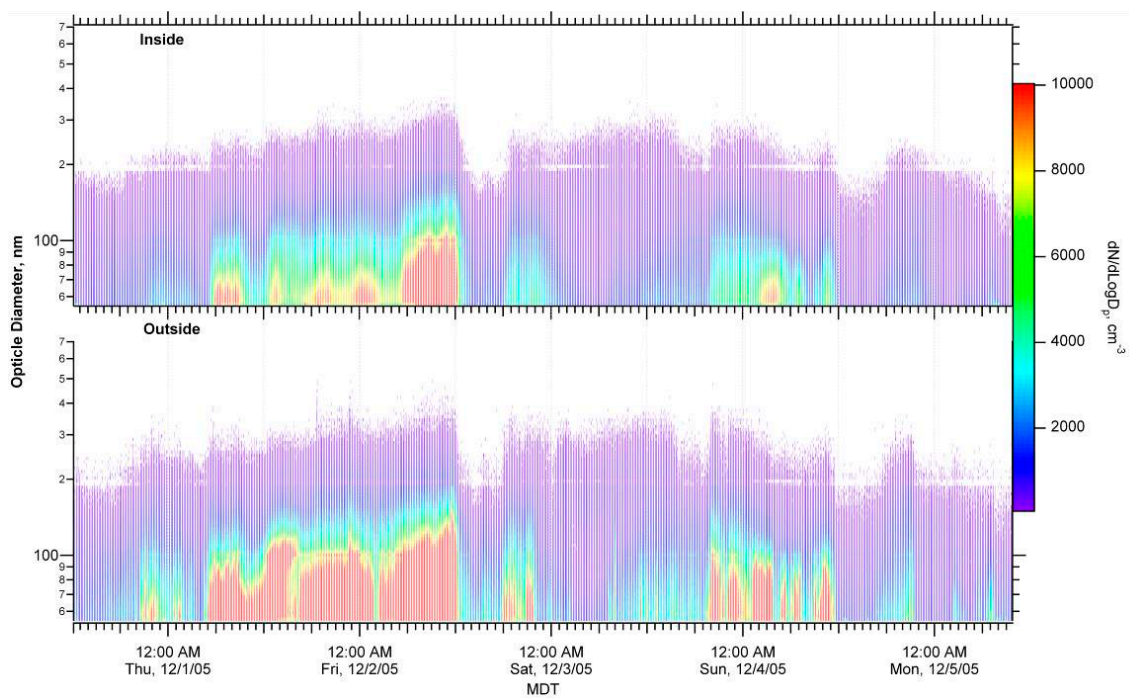

Figure S7. Fall 2005: Office building, Denver.

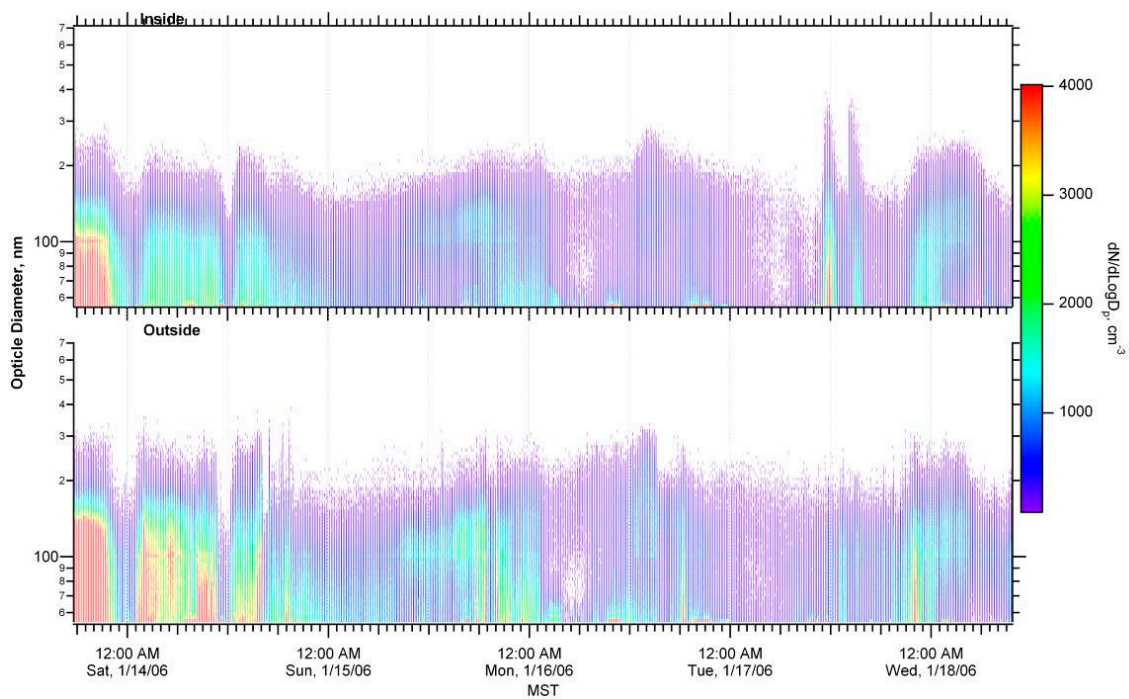

Figure S8. Winter 2006: University Building, Boulder.



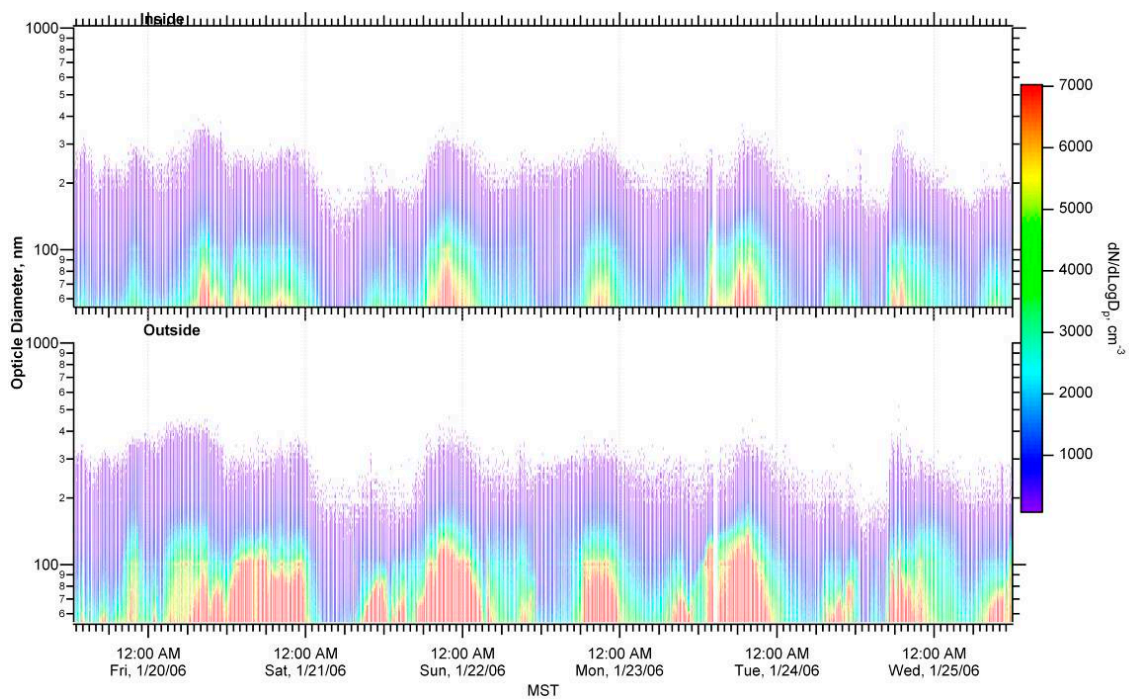

Figure S9. Winter 2006: Denver School.

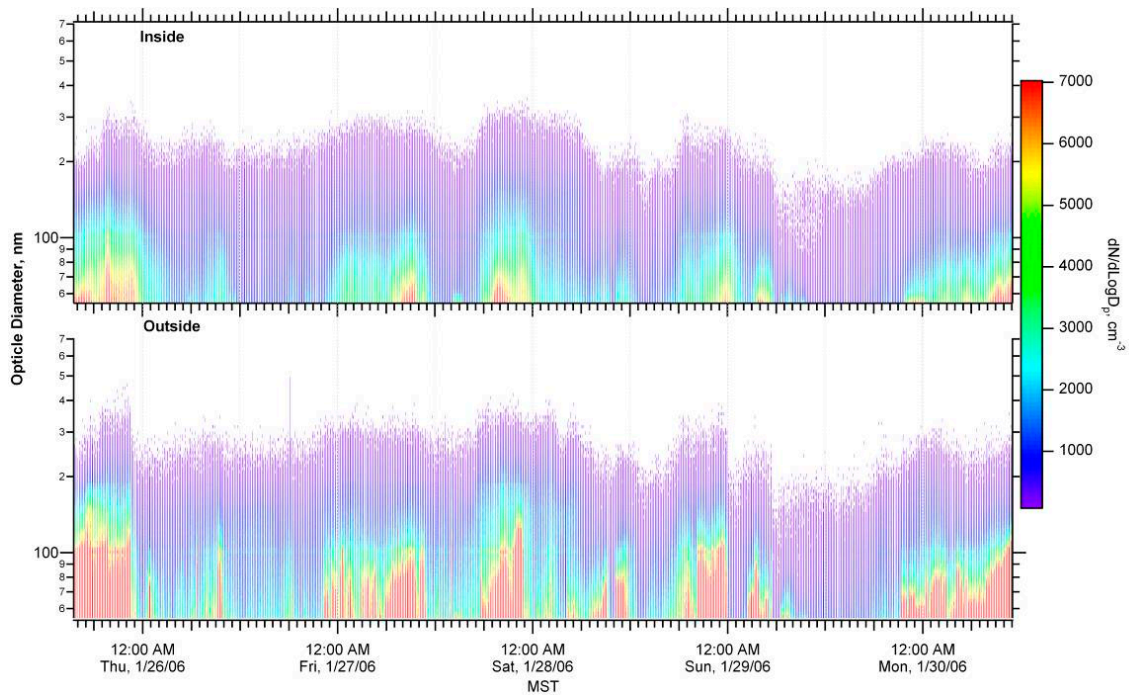

Figure S10. Winter 2006: Office building, Denver.

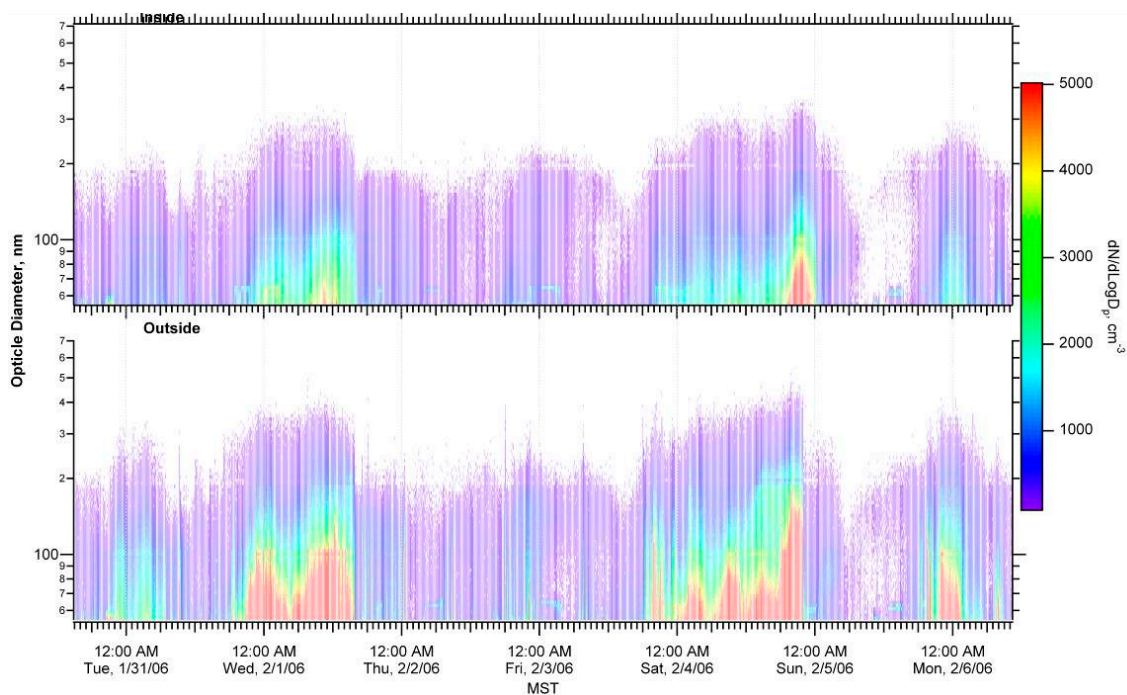

Figure S11. Winter 2006: Boulder School.

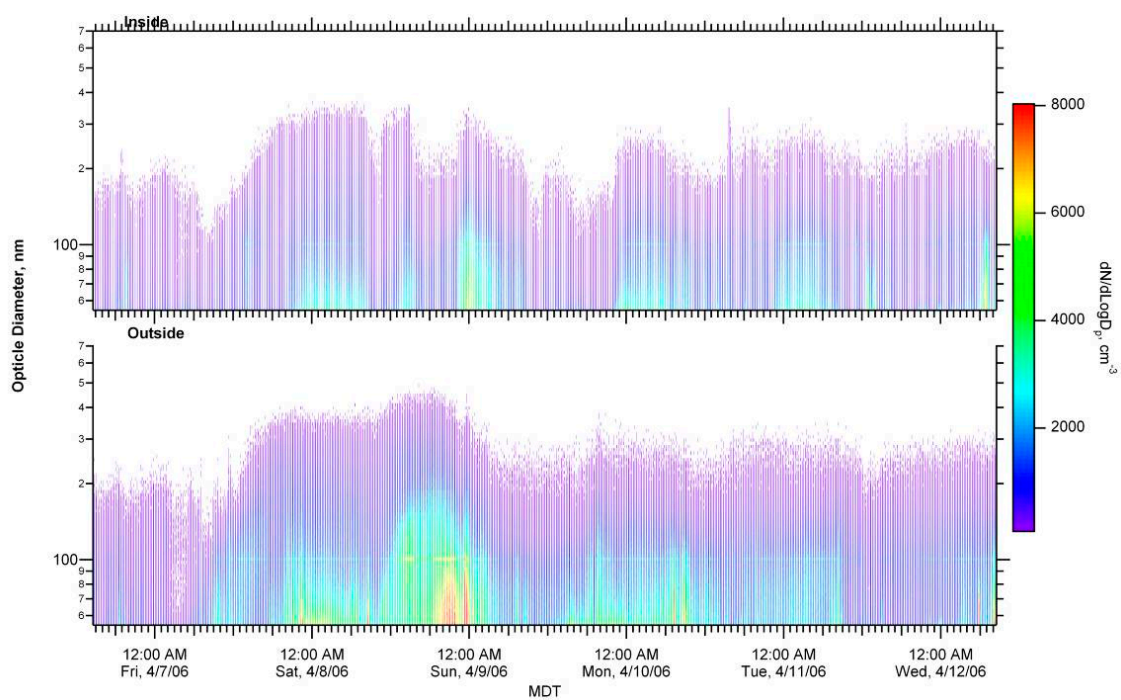

Figure S12. Spring 2006: University Building, Boulder.

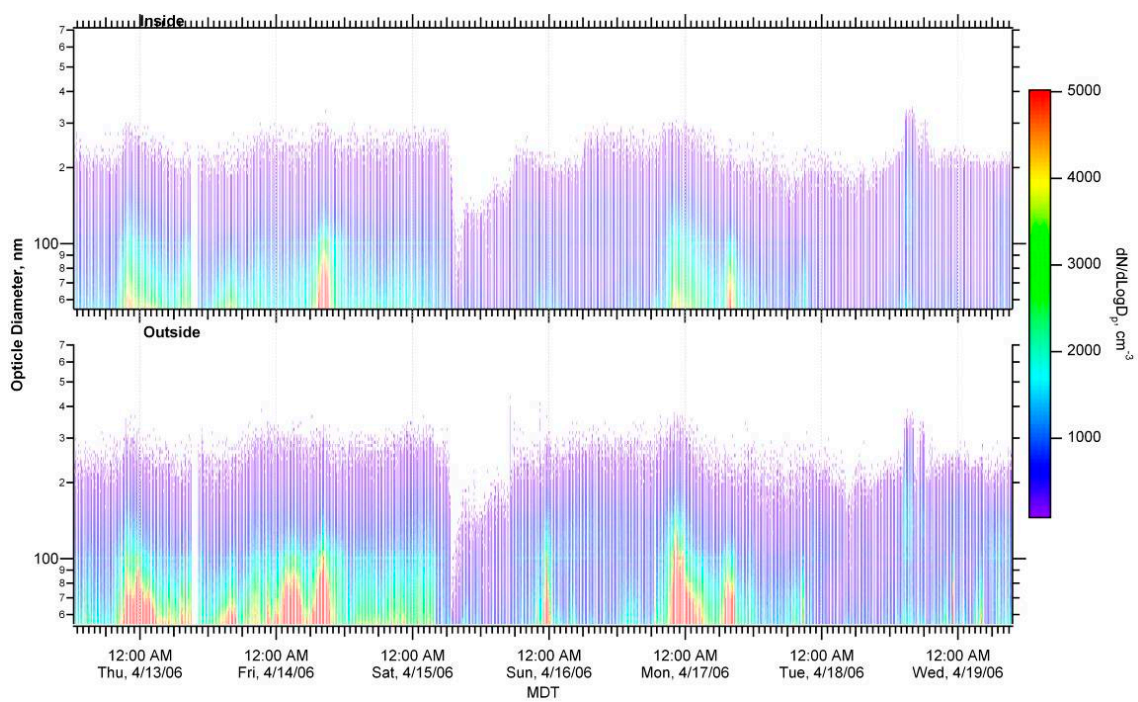

Figure S13. Spring 2006: Denver School.

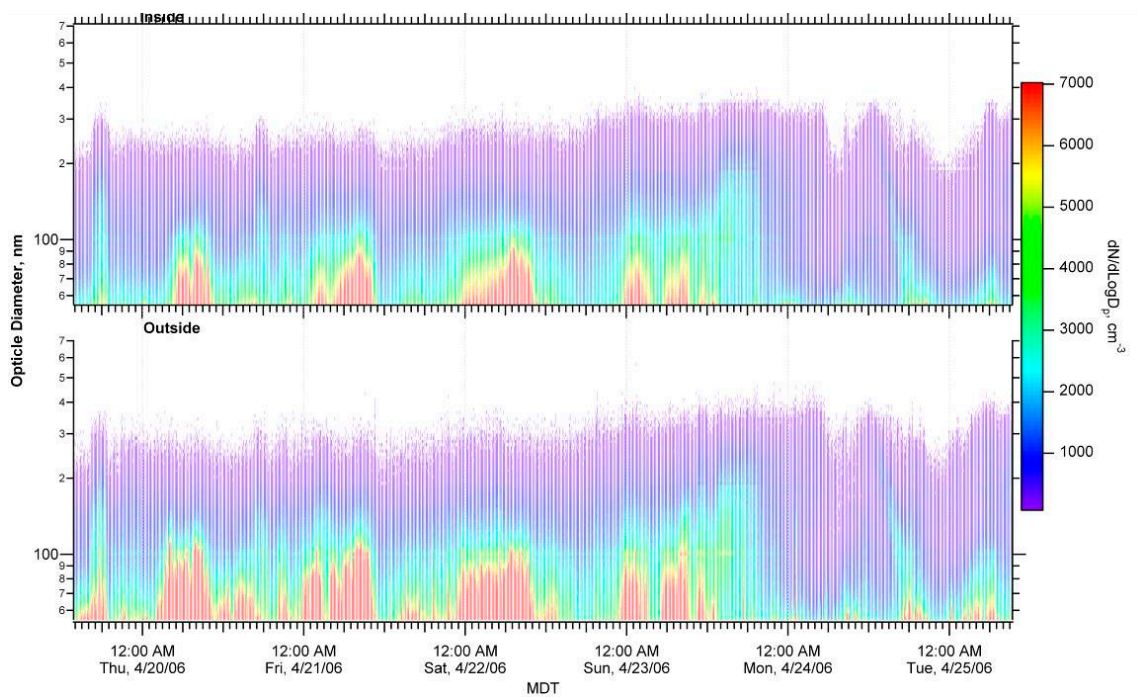

Figure S14. Spring 2006: Office building, Denver.



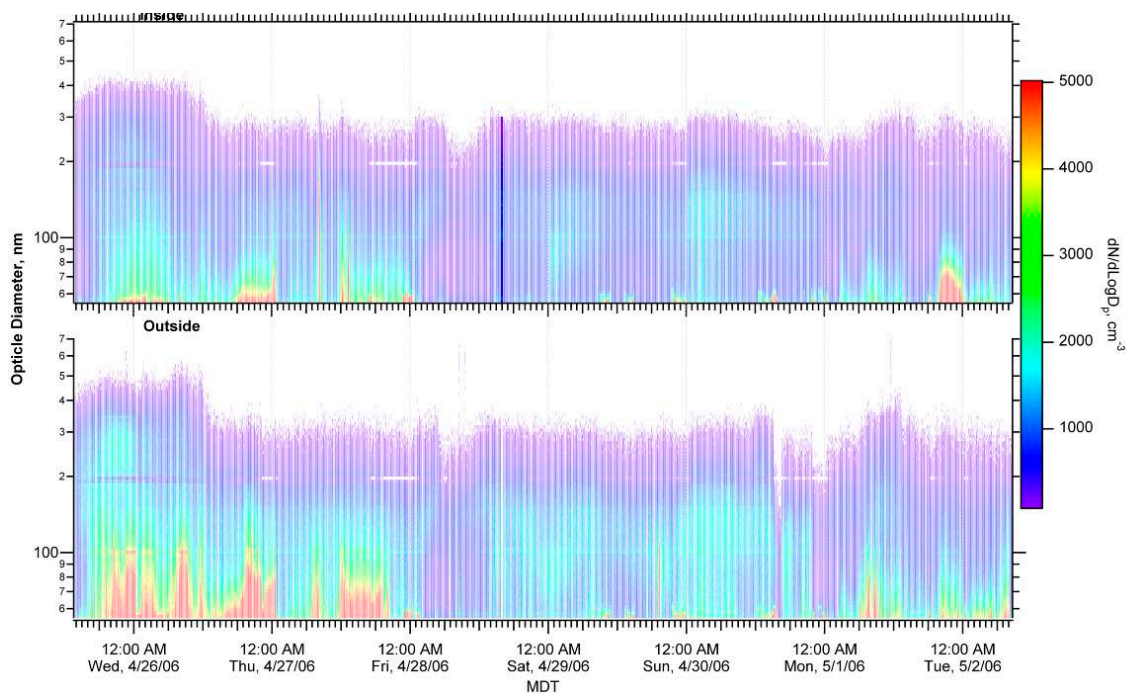

Figure S15. Spring 2006: Boulder School.

**2. Section B: Indoor and Outdoor PM<sub>0.7</sub> Number Concentration Plots**

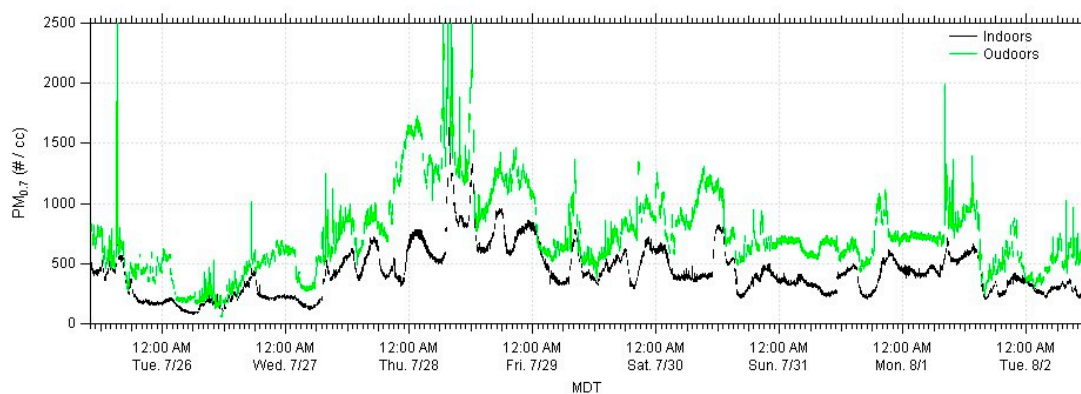

Figure S16. Summer 2005: University Building, Boulder.

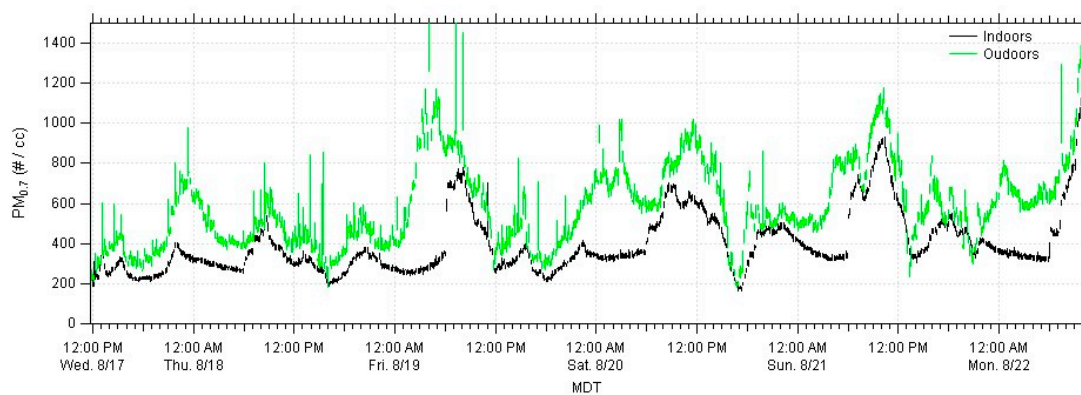

Figure S17. Summer 2005: Denver School.

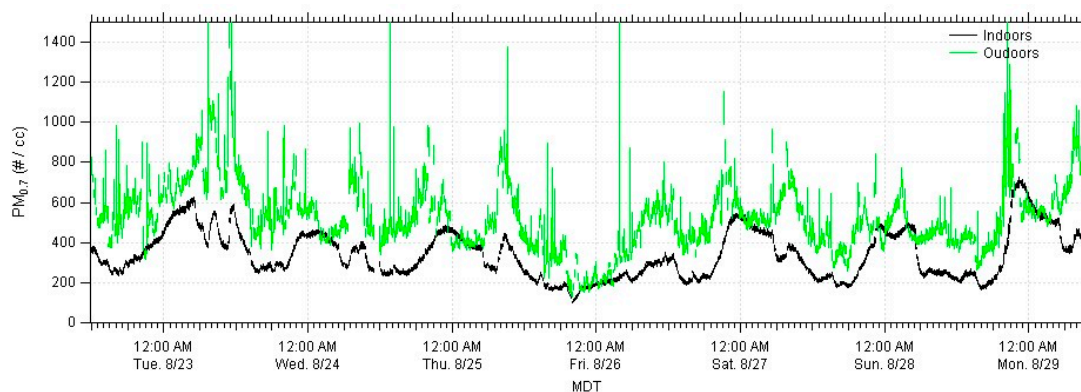

Figure S18. Summer 2005: Office building, Denver.

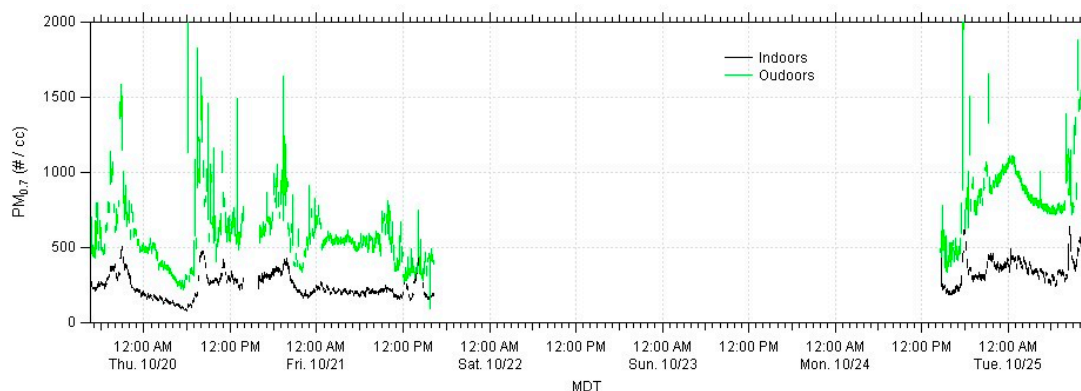

Figure S19. Fall 2005: University Building, Boulder.

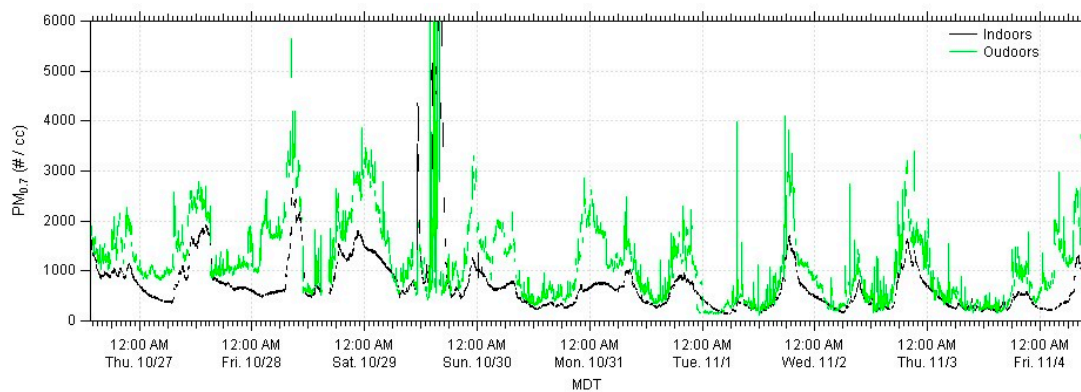

Figure S20. Fall 2005: Denver School.

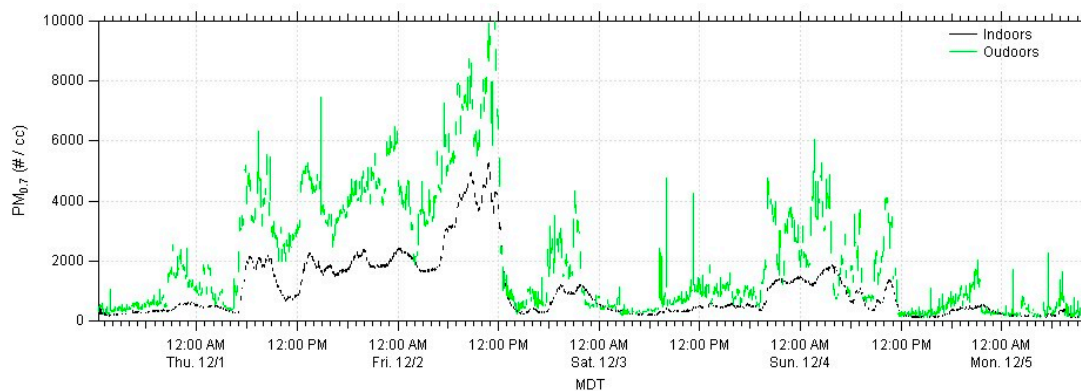

Figure S21. Fall 2005: Office building, Denver.

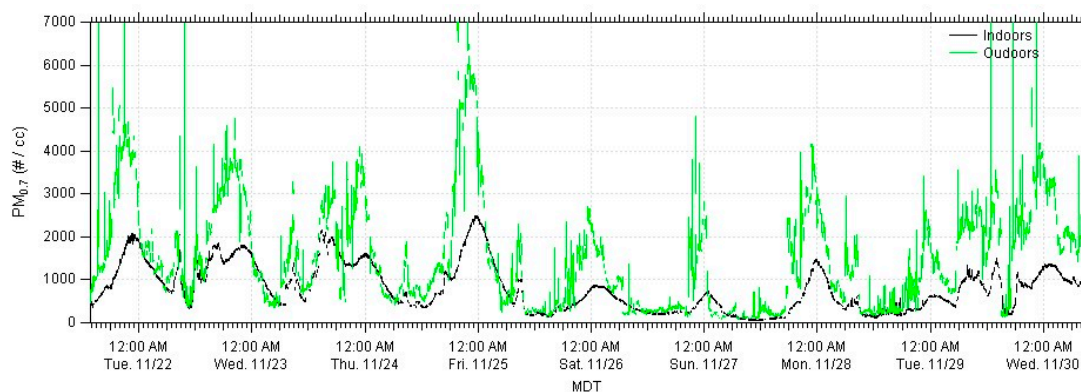

Figure S22. Fall 2005: Boulder School.

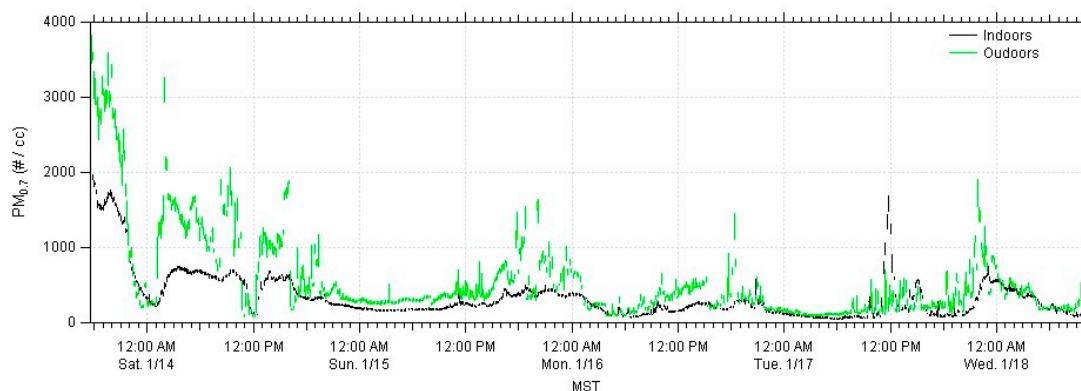

Figure S23. Winter 2006: University Building, Boulder.

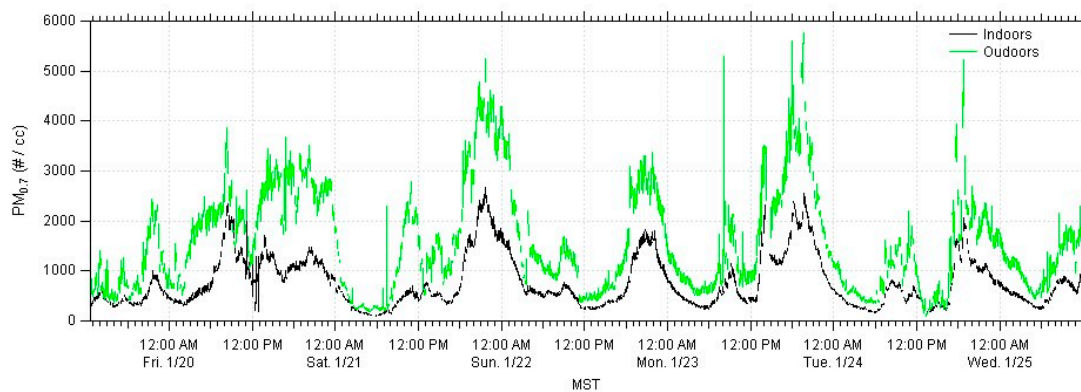

Figure S24. Winter 2006: Denver School.

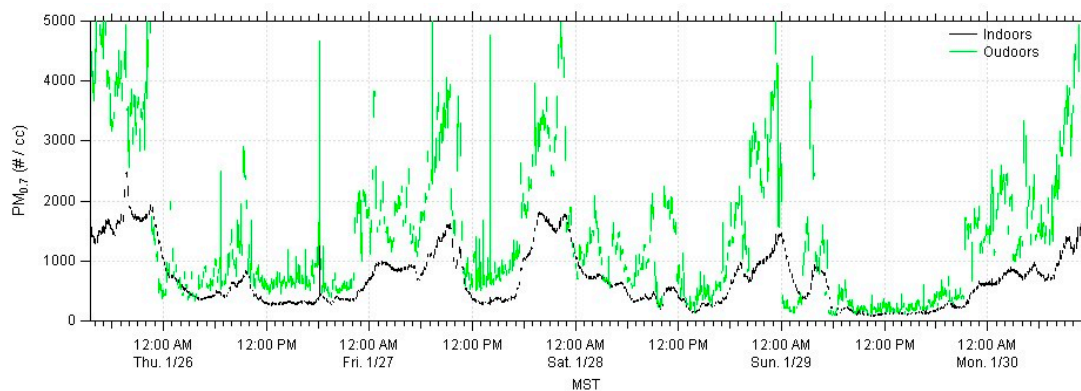

Figure S25. Winter 2006: Office building, Denver.



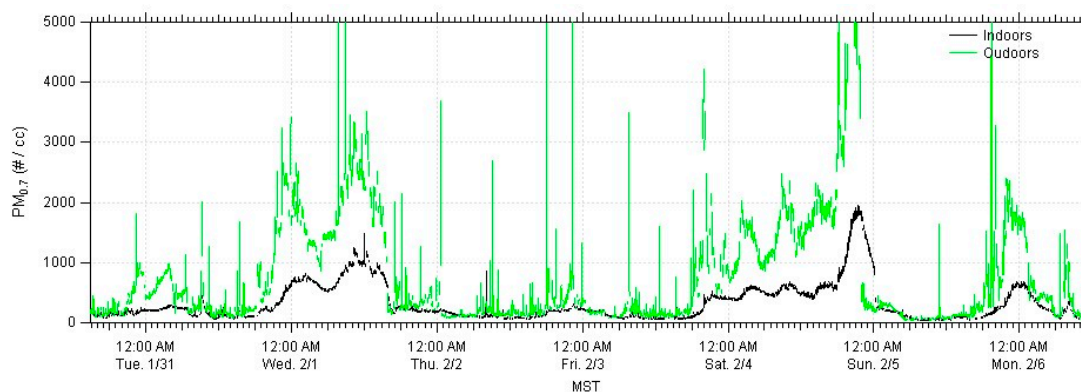

Figure S26. Winter 2006: Boulder School.

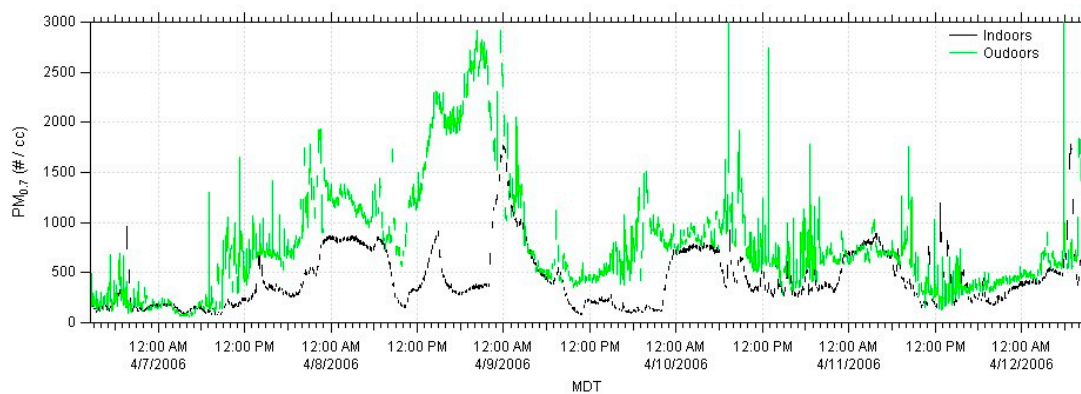

Figure S27. Spring 2006: University Building, Boulder.

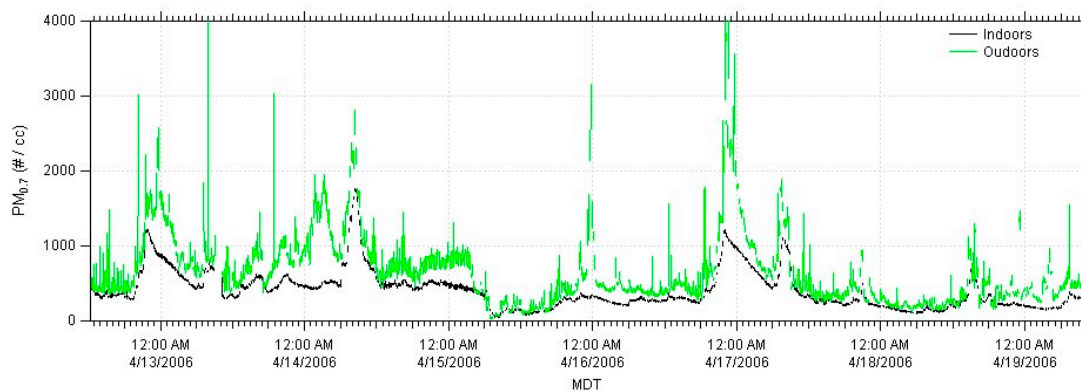

Figure S28. Spring 2006: Denver School.

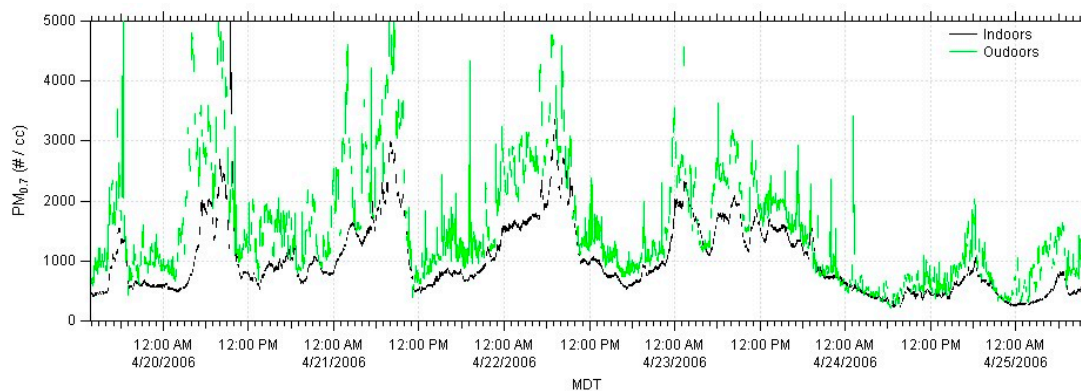

Figure S29. Spring 2006: Office building, Denver.

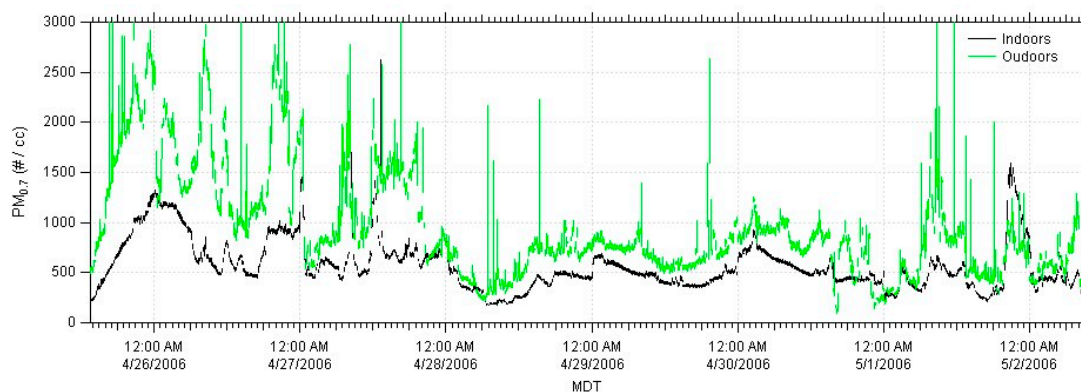

Figure S30. Spring 2006: Boulder School.

### 3. Section C: Tables of Average and Standard Deviations for Indoor/Outdoor Ratio, Slope, and Correlation Coefficient

Table S1. Combined yearlong indoor/outdoor ratio, slope, and correlation coefficient for each building.

| Building Type  | Day Type | Time of Day | Ratio     |       | Slope     |       | r <sub>p</sub> |       |
|----------------|----------|-------------|-----------|-------|-----------|-------|----------------|-------|
|                |          |             | Ultrafine | Fine  | Ultrafine | Fine  | Ultrafine      | Fine  |
| University     | Weekday  | All         | 0.617     | 0.581 | 0.451     | 0.279 | 0.806          | 0.656 |
|                |          | Day         | 0.621     | 0.588 | 0.512     | 0.410 | 0.834          | 0.809 |
|                |          | Night       | 0.678     | 0.615 | 0.451     | 0.416 | 0.817          | 0.768 |
|                | Weekend  | Day         | 0.518     | 0.521 | 0.260     | 0.073 | 0.626          | 0.270 |
|                |          | Night       | 0.573     | 0.548 | 0.474     | 0.332 | 0.875          | 0.782 |
|                |          | All         | 0.644     | 0.670 | 0.457     | 0.413 | 0.770          | 0.799 |
| Denver School  | Weekday  | Day         | 0.654     | 0.707 | 0.478     | 0.396 | 0.892          | 0.851 |
|                |          | Night       | 0.597     | 0.604 | 0.420     | 0.341 | 0.834          | 0.776 |
|                |          | All         | 0.632     | 0.642 | 0.457     | 0.428 | 0.903          | 0.867 |
|                | Weekend  | Day         | 0.757     | 0.763 | 0.527     | 0.466 | 0.526          | 0.772 |
|                |          | Night       | 0.565     | 0.572 | 0.430     | 0.394 | 0.936          | 0.925 |
|                |          | All         | 0.632     | 0.642 | 0.457     | 0.428 | 0.903          | 0.867 |
| Office         | Weekday  | Day         | 0.548     | 0.579 | 0.499     | 0.418 | 0.942          | 0.918 |
|                |          | Night       | 0.678     | 0.686 | 0.378     | 0.299 | 0.879          | 0.854 |
|                |          | All         | 0.676     | 0.635 | 0.379     | 0.310 | 0.818          | 0.770 |
|                | Weekend  | Day         | 0.572     | 0.620 | 0.570     | 0.744 | 0.894          | 0.962 |
|                |          | Night       | 0.840     | 0.748 | 0.359     | 0.413 | 0.813          | 0.744 |
|                |          | All         | 0.676     | 0.635 | 0.379     | 0.310 | 0.818          | 0.770 |
| Boulder School | Weekday  | Day         | 0.583     | 0.569 | 0.393     | 0.322 | 0.813          | 0.798 |
|                |          | Night       | 0.738     | 0.638 | 0.396     | 0.346 | 0.835          | 0.842 |
|                |          | All         | 0.676     | 0.635 | 0.379     | 0.310 | 0.818          | 0.770 |
|                | Weekend  | Day         | 0.612     | 0.642 | 0.222     | 0.189 | 0.861          | 0.543 |
|                |          | Night       | 0.948     | 0.873 | 0.264     | 0.211 | 0.735          | 0.623 |
|                |          | All         | 0.676     | 0.635 | 0.379     | 0.310 | 0.818          | 0.770 |

All = All data from that building; Day = 6 am–8 pm; Night = 8 pm–6 am.

Table S2. Standard deviations of combined yearlong indoor/outdoor ratio and slope for each season.

| Building Type | Day Type | Time of Day | Ratio Standard Deviation |        | Slope Standard Deviation |        |
|---------------|----------|-------------|--------------------------|--------|--------------------------|--------|
|               |          |             | Ultrafine                | Fine   | Ultrafine                | Fine   |
| University    | Weekday  | All         | 0.3502                   | 0.2263 | 0.0069                   | 0.0067 |
|               |          | Day         | 0.2972                   | 0.1800 | 0.0112                   | 0.0098 |
|               |          | Night       | 0.4381                   | 0.2255 | 0.0117                   | 0.0127 |
|               | Weekend  | Day         | 0.3414                   | 0.3245 | 0.0169                   | 0.0135 |
|               |          | Night       | 0.1734                   | 0.1773 | 0.0162                   | 0.0165 |
|               |          | All         | 0.4091                   | 0.3105 | 0.0070                   | 0.0058 |
| Denver School |          | All         | 0.4091                   | 0.3105 | 0.0070                   | 0.0058 |

|                |         |       |        |        |        |        |
|----------------|---------|-------|--------|--------|--------|--------|
|                | Weekday | Day   | 0.1851 | 0.1946 | 0.0070 | 0.0071 |
|                |         | Night | 0.3455 | 0.2353 | 0.0094 | 0.0094 |
|                | Weekend | Day   | 0.7952 | 0.5712 | 0.0377 | 0.0170 |
|                |         | Night | 0.1776 | 0.1405 | 0.0087 | 0.0088 |
| Office         | All     |       | 0.3335 | 0.1987 | 0.0042 | 0.0048 |
|                | Weekday | Day   | 0.1773 | 0.1443 | 0.0057 | 0.0058 |
|                |         | Night | 0.2943 | 0.2199 | 0.0076 | 0.0067 |
|                | Weekend | Day   | 0.1738 | 0.1231 | 0.0122 | 0.0090 |
|                |         | Night | 0.6375 | 0.2810 | 0.0132 | 0.0190 |
|                | All     |       | 0.5540 | 0.4095 | 0.0052 | 0.0050 |
| Boulder School | Weekday | Day   | 0.3311 | 0.2253 | 0.0085 | 0.0073 |
|                |         | Night | 0.6473 | 0.3409 | 0.0091 | 0.0078 |
|                | Weekend | Day   | 0.3291 | 0.5159 | 0.0065 | 0.0145 |
|                |         | Night | 0.9543 | 0.7410 | 0.0144 | 0.0157 |

All = All data from that building; Day = 6 am–8 pm; Night = 8 pm–6 am.

**Table S3.** Seasonal indoor/outdoor ratio, slope, and correlation coefficient.

| Season | Day Type | Time of Day | Ratio     |       | Slope     |       | rp        |       |
|--------|----------|-------------|-----------|-------|-----------|-------|-----------|-------|
|        |          |             | Ultrafine | Fine  | Ultrafine | Fine  | Ultrafine | Fine  |
| Summer | Weekday  | Day         | 0.549     | 0.575 | 0.625     | 0.663 | 0.892     | 0.848 |
|        |          | Night       | 0.373     | 0.377 | 0.662     | 0.667 | 0.778     | 0.601 |
|        | Weekend  | Day         | 0.609     | 0.528 | 0.596     | 0.640 | 0.826     | 0.678 |
|        |          | Night       | 0.291     | 0.249 | 0.693     | 0.722 | 0.536     | 0.414 |
| Fall   | Weekday  | Day         | 0.495     | 0.411 | 0.621     | 0.616 | 0.912     | 0.874 |
|        |          | Night       | 0.401     | 0.331 | 0.630     | 0.590 | 0.856     | 0.863 |
|        | Weekend  | Day         | 0.564     | 0.472 | 0.767     | 0.713 | 0.537     | 0.772 |
|        |          | Night       | 0.318     | 0.262 | 0.797     | 0.649 | 0.821     | 0.795 |
| Winter | Weekday  | Day         | 0.406     | 0.308 | 0.539     | 0.526 | 0.906     | 0.892 |
|        |          | Night       | 0.400     | 0.311 | 0.687     | 0.578 | 0.860     | 0.835 |
|        | Weekend  | Day         | 0.278     | 0.178 | 0.534     | 0.550 | 0.850     | 0.722 |
|        |          | Night       | 0.358     | 0.291 | 0.764     | 0.686 | 0.860     | 0.837 |
| Spring | Weekday  | Day         | 0.534     | 0.405 | 0.619     | 0.650 | 0.904     | 0.871 |
|        |          | Night       | 0.364     | 0.483 | 0.715     | 0.718 | 0.796     | 0.901 |
|        | Weekend  | Day         | 0.670     | 0.447 | 0.625     | 0.700 | 0.927     | 0.687 |
|        |          | Night       | 0.528     | 0.523 | 0.681     | 0.700 | 0.873     | 0.748 |

Day = 6 am–8 pm; Night = 8 pm–6 am.

**Table S4.** Standard deviations for seasonal indoor/outdoor ratio and slope.

| Season | Day Type | Time of Day | Ratio Standard Deviation |        | Slope Standard Deviation |        |
|--------|----------|-------------|--------------------------|--------|--------------------------|--------|
|        |          |             | Ultrafine                | Fine   | Ultrafine                | Fine   |
| Summer | Weekday  | Day         | 0.1651                   | 0.1302 | 0.0091                   | 0.0117 |
|        |          | Night       | 0.3322                   | 0.1929 | 0.0117                   | 0.0196 |
|        | Weekend  | Day         | 0.1631                   | 0.1526 | 0.0207                   | 0.0283 |
|        |          | Night       | 0.1982                   | 0.1606 | 0.0285                   | 0.0349 |
| Fall   | Weekday  | Day         | 0.3144                   | 0.2439 | 0.0062                   | 0.0064 |
|        |          | Night       | 0.4633                   | 0.3238 | 0.0077                   | 0.0062 |
|        | Weekend  | Day         | 0.9130                   | 0.5492 | 0.0449                   | 0.0195 |
|        |          | Night       | 0.8226                   | 0.3421 | 0.0131                   | 0.0118 |
| Winter | Weekday  | Day         | 0.2475                   | 0.1816 | 0.0063                   | 0.0051 |
|        |          | Night       | 0.6382                   | 0.2637 | 0.0088                   | 0.0075 |
|        | Weekend  | Day         | 0.3192                   | 0.3117 | 0.0073                   | 0.0073 |



|        |         |       |        |        |        |        |
|--------|---------|-------|--------|--------|--------|--------|
| Spring | Weekday | Night | 0.7741 | 0.6333 | 0.0109 | 0.0097 |
|        |         | Day   | 0.2537 | 0.1760 | 0.0079 | 0.0072 |
|        | Weekend | Night | 0.3051 | 0.1929 | 0.0099 | 0.0083 |
|        |         | Day   | 0.2664 | 0.5476 | 0.0123 | 0.0213 |
|        | Weekend | Night | 0.2939 | 0.2808 | 0.0159 | 0.0251 |
|        |         | Day   |        |        |        |        |

Day = 6 am–8pm; Night = 8 pm–6 am.

**Table S5.** Indoor/outdoor ratio, slope, and correlation coefficient of entire dataset by period of the week.

| Day Type | Time of Day | Ratio     |       | Slope     |       | r <sub>p</sub> |       |
|----------|-------------|-----------|-------|-----------|-------|----------------|-------|
|          |             | Ultrafine | Fine  | Ultrafine | Fine  | Ultrafine      | Fine  |
|          | All         | 0.643     | 0.635 | 0.442     | 0.374 | 0.854          | 0.800 |
| Weekday  | Day         | 0.603     | 0.615 | 0.476     | 0.382 | 0.909          | 0.861 |
|          | Night       | 0.671     | 0.634 | 0.404     | 0.349 | 0.863          | 0.841 |
| Weekend  | Day         | 0.622     | 0.644 | 0.477     | 0.409 | 0.681          | 0.713 |
|          | Night       | 0.734     | 0.689 | 0.379     | 0.320 | 0.846          | 0.741 |
| Weekday  | Day         | 0.632     | 0.623 | 0.448     | 0.369 | 0.891          | 0.853 |
|          | Night       | 0.668     | 0.662 | 0.424     | 0.382 | 0.753          | 0.720 |
| Weekend  | Day         | 0.609     | 0.624 | 0.477     | 0.391 | 0.856          | 0.795 |
|          | Night       | 0.689     | 0.650 | 0.397     | 0.343 | 0.858          | 0.812 |

All = All data from entire dataset; Day = 6 am–8 pm; Night = 8 pm–6 am.

**Table S6.** Standard deviations for entire dataset for indoor/outdoor ratio and slope by periods of the week.

| Day Type | Time of Day | Ratio Standard Deviation |        | Slope Standard Deviation |        |
|----------|-------------|--------------------------|--------|--------------------------|--------|
|          |             | Ultrafine                | Fine   | Ultrafine                | Fine   |
|          | All         | 0.4226                   | 0.3015 | 0.0026                   | 0.0027 |
| Weekday  | Day         | 0.2589                   | 0.1989 | 0.0034                   | 0.0035 |
|          | Night       | 0.4565                   | 0.2631 | 0.0042                   | 0.0040 |
| Weekend  | Day         | 0.4897                   | 0.4270 | 0.0120                   | 0.0093 |
|          | Night       | 0.6045                   | 0.4199 | 0.0067                   | 0.0082 |
| Weekday  | Day         | 0.3594                   | 0.2290 | 0.0027                   | 0.0026 |
|          | Night       | 0.5426                   | 0.4246 | 0.0066                   | 0.0066 |
| Weekend  | Day         | 0.3462                   | 0.2892 | 0.0037                   | 0.0038 |
|          | Night       | 0.5043                   | 0.3169 | 0.0036                   | 0.0037 |

All = All data from entire dataset; Day = 6 am–8 pm; Night = 8 pm–6 am.

**Table S7.** Seasonal indoor/outdoor ratio, slope, and correlation coefficient for University building only, by HVAC usage.

| Season | HVAC Usage | Ratio     |       | Slope     |       | r <sub>p</sub> |       |
|--------|------------|-----------|-------|-----------|-------|----------------|-------|
|        |            | Ultrafine | Fine  | Ultrafine | Fine  | Ultrafine      | Fine  |
| Summer | on         | 0.642     | 0.648 | 0.539     | 0.600 | -              | -     |
|        | off        | 0.555     | 0.542 | 0.420     | 0.427 | -              | -     |
| Fall   | on         | 0.478     | 0.440 | 0.238     | 0.205 | -              | -     |
|        | off        | 0.375     | 0.417 | 0.354     | 0.319 | -              | -     |
| Winter | on         | 0.644     | 0.561 | 0.621     | 0.365 | -              | -     |
|        | off        | 0.788     | 0.666 | 0.380     | 0.269 | -              | -     |
| Spring | on         | 0.617     | 0.571 | 0.282     | 0.222 | -              | -     |
|        | off        | 0.616     | 0.570 | 0.382     | 0.193 | -              | -     |
| Total  | on         | 0.610     | 0.581 | 0.514     | 0.364 | 0.837          | 0.788 |

|     |       |       |       |       |       |       |
|-----|-------|-------|-------|-------|-------|-------|
| off | 0.612 | 0.568 | 0.407 | 0.259 | 0.778 | 0.653 |
|-----|-------|-------|-------|-------|-------|-------|

Total = all seasons combined.

**Table S8.** Standard deviations for indoor/outdoor ratio and slope for University building only, by HVAC usage.

| Season | HVAC Usage | Ratio Standard Deviation |       | Slope Standard Deviation |        |
|--------|------------|--------------------------|-------|--------------------------|--------|
|        |            | Ultrafine                | Fine  | Ultrafine                | Fine   |
| Summer | on         | 0.183                    | 0.128 | 0.012                    | 0.0171 |
|        | off        | 0.183                    | 0.132 | 0.012                    | 0.0207 |
| Fall   | on         | 0.246                    | 0.122 | 0.0147                   | 0.0129 |
|        | off        | 0.122                    | 0.043 | 0.017                    | 0.0148 |
| Winter | on         | 0.472                    | 0.322 | 0.0125                   | 0.0069 |
|        | off        | 0.643                    | 0.320 | 0.014                    | 0.0134 |
| Spring | on         | 0.410                    | 0.236 | 0.0359                   | 0.0142 |
|        | off        | 0.334                    | 0.297 | 0.0279                   | 0.0189 |
| Total  | on         | 0.323                    | 0.213 | 0.010                    | 0.008  |
|        | off        | 0.410                    | 0.245 | 0.010                    | 0.009  |

Total = all seasons combined.

#### 4. Section D: Indoor and Outdoor CO<sub>2</sub> Concentration Plots

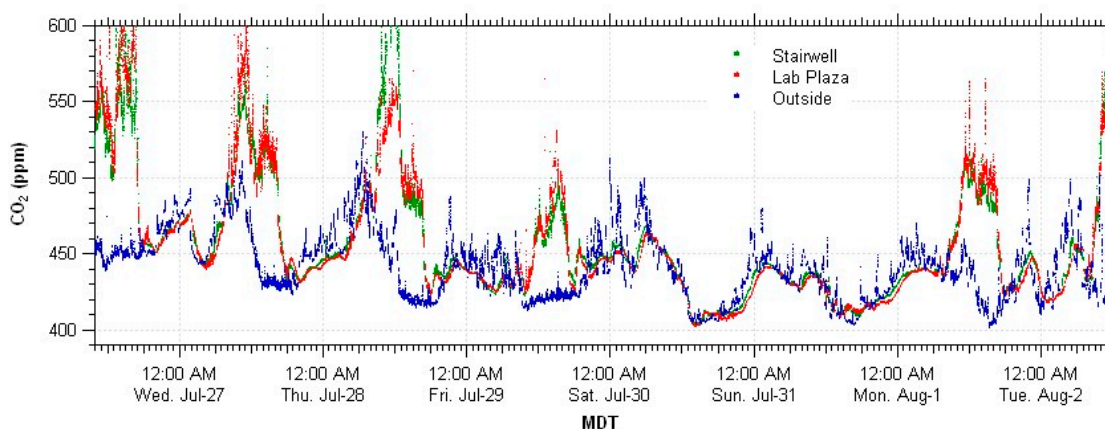

**Figure S31.** Summer 2005: University Building, Boulder (week 1, coincides with UHSAS data).

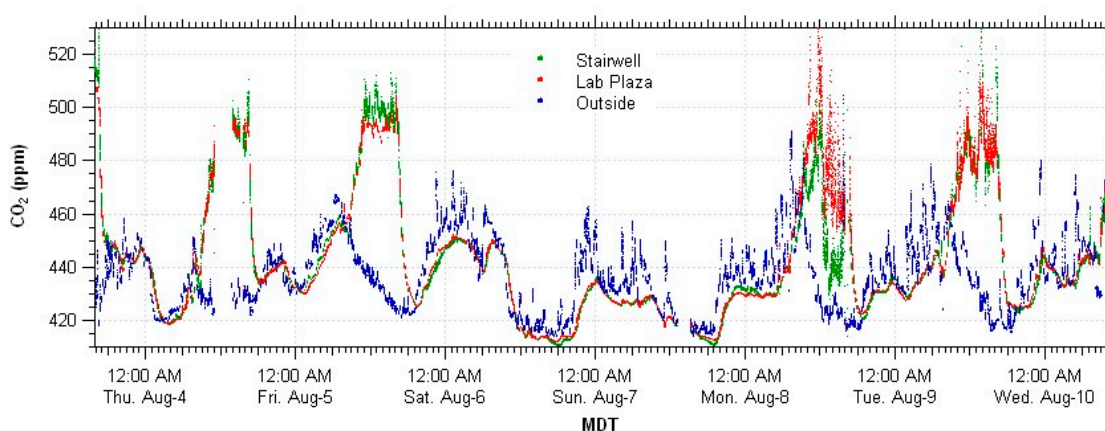

**Figure S32.** Summer 2005: University Building, Boulder (week 2, coincides with AMS data).

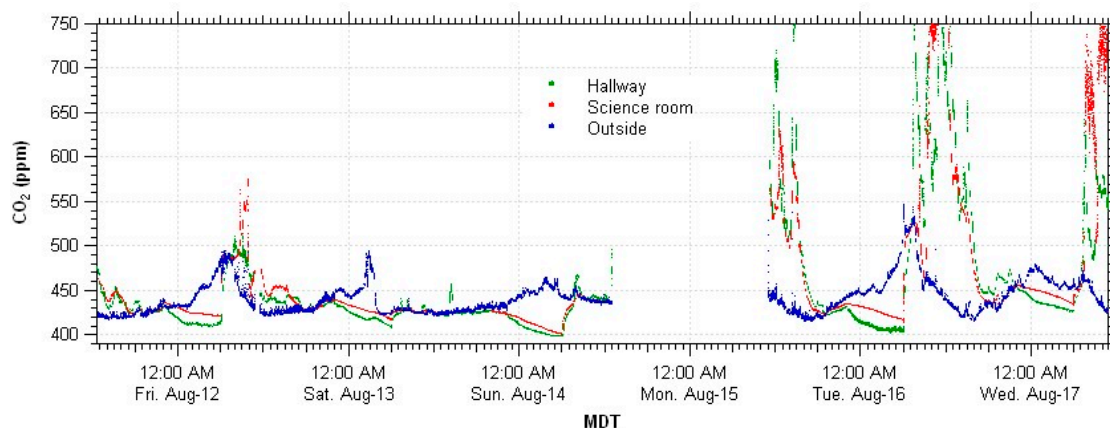

Figure S33. Summer 2005: Denver School (week 1, coincides with AMS).

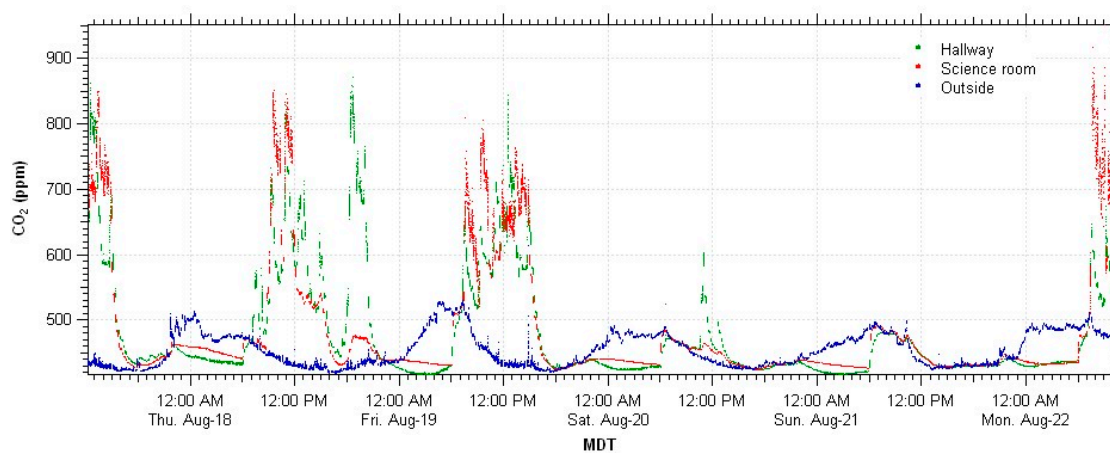

Figure S34. Summer 2005: Denver School (week 2, coincides with UHSAS).

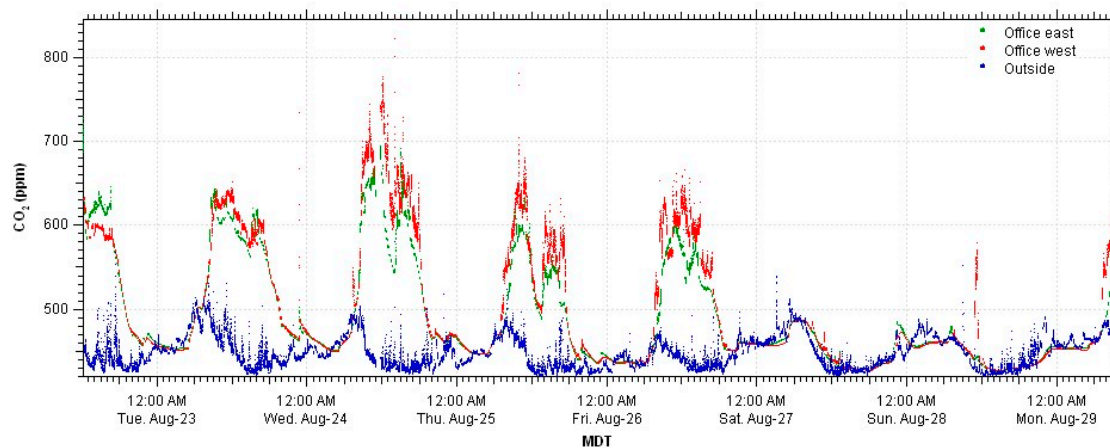

Figure S35. Summer 2005: Office building, Denver.



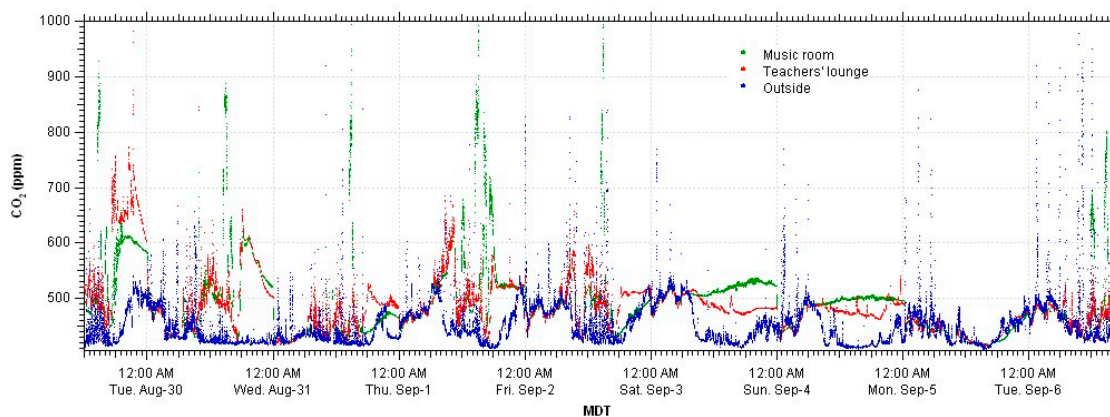

Figure S36. Summer 2005: Boulder School.

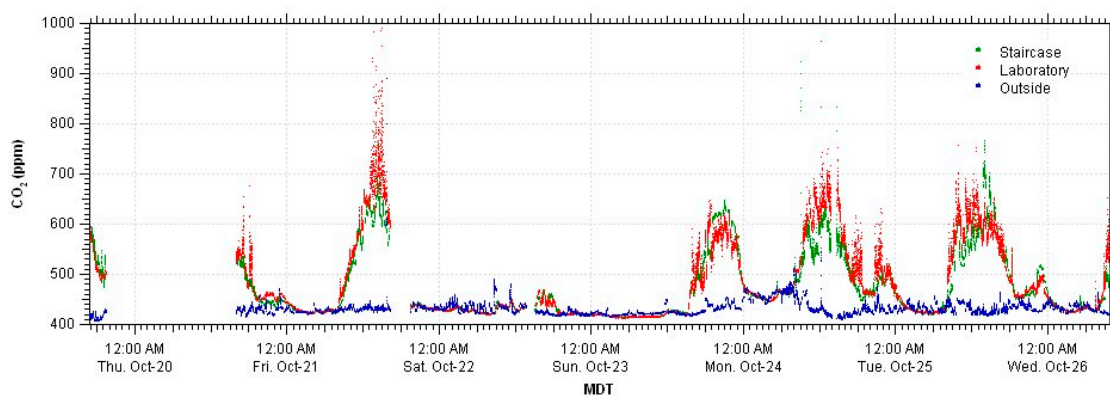

Figure S37. Fall 2005: University Building, Boulder.

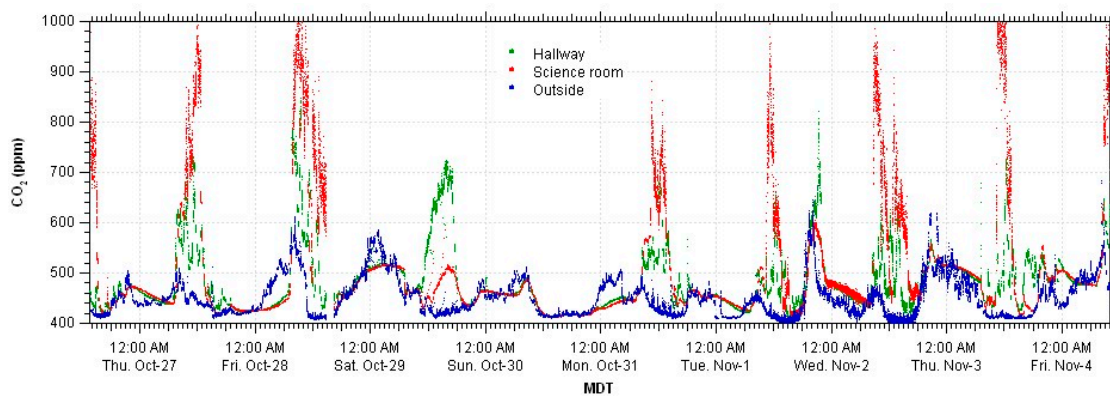

Figure S38. Fall 2005: Denver School.

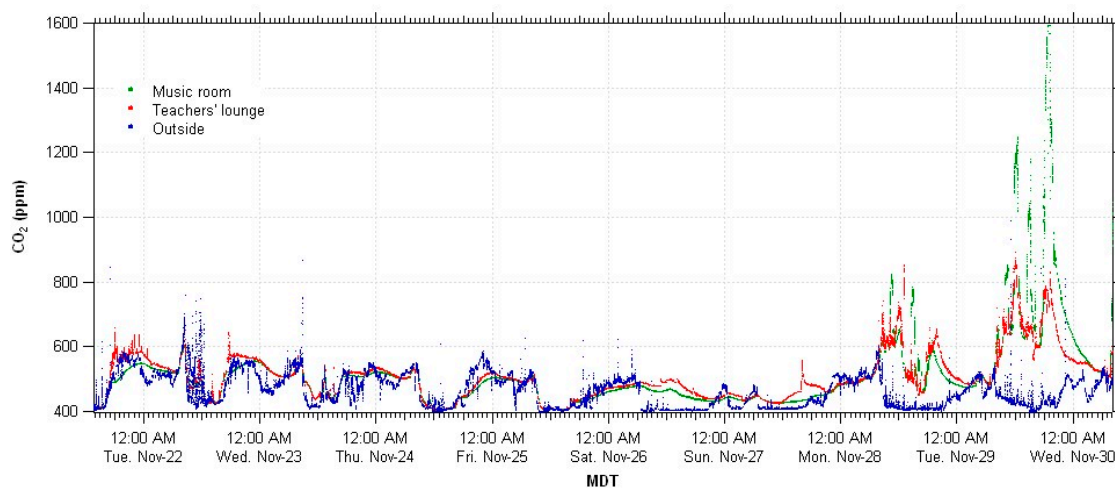

Figure S39. Fall 2005: Boulder School.

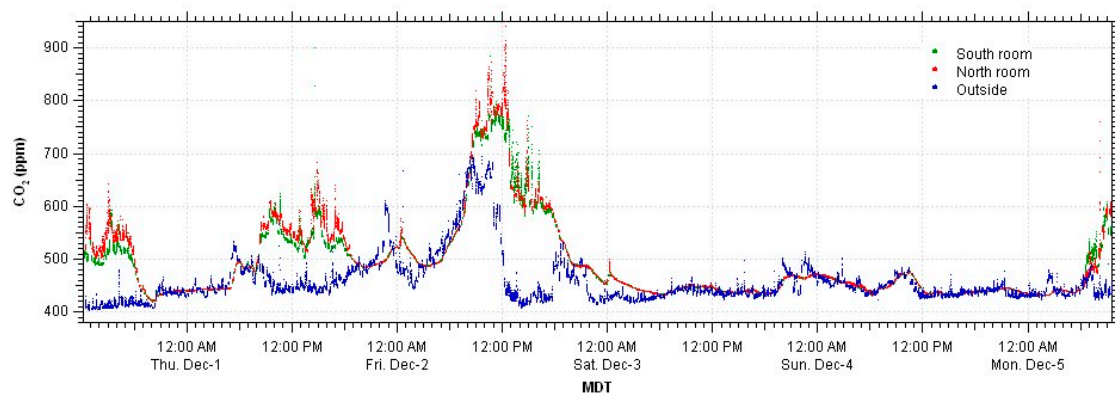

Figure S40. Fall 2005: Office building, Denver.

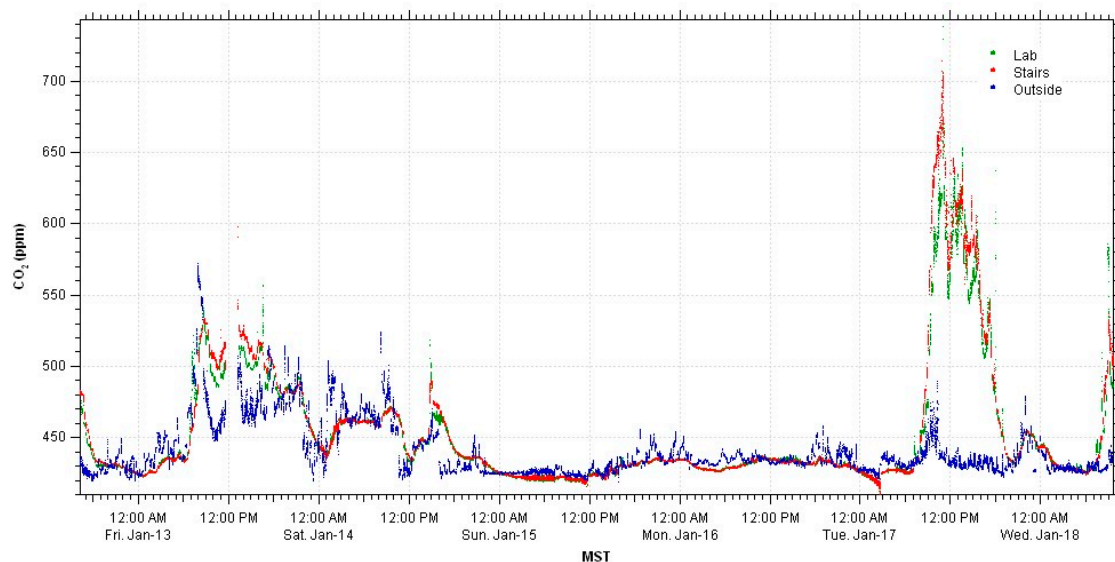

Figure S41. Winter 2006: University Building, Boulder.

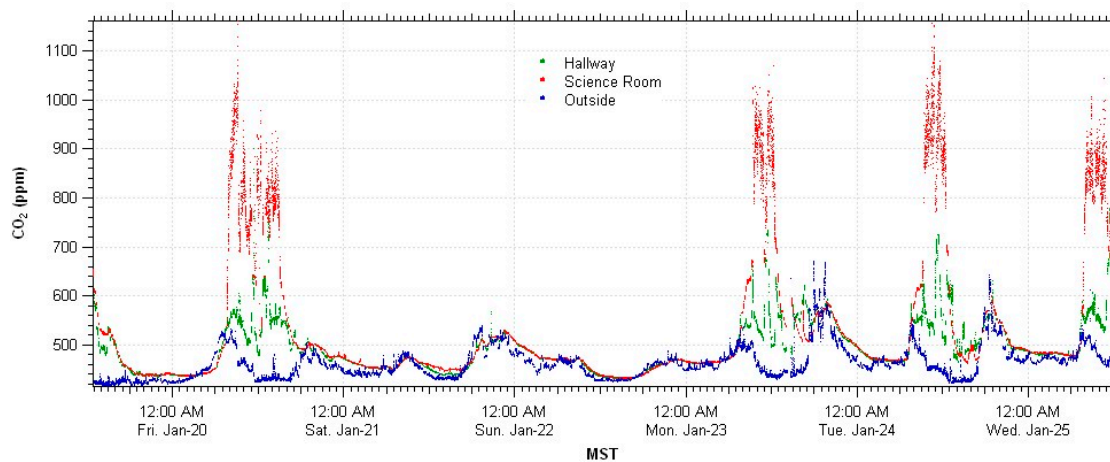

Figure S42. Winter 2006: Denver School.

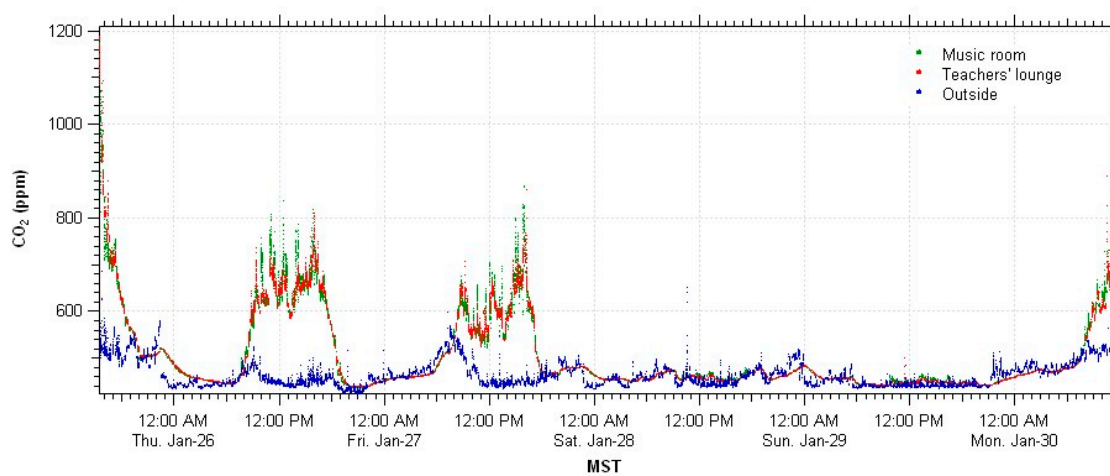

Figure S43. Winter 2006: Office building, Denver.

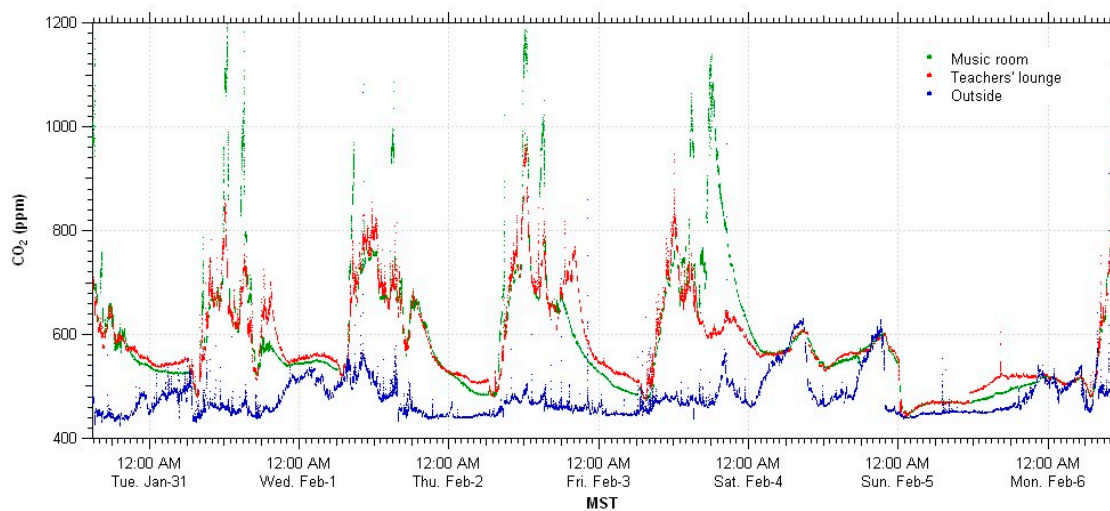

Figure S44. Winter 2006: Boulder School.



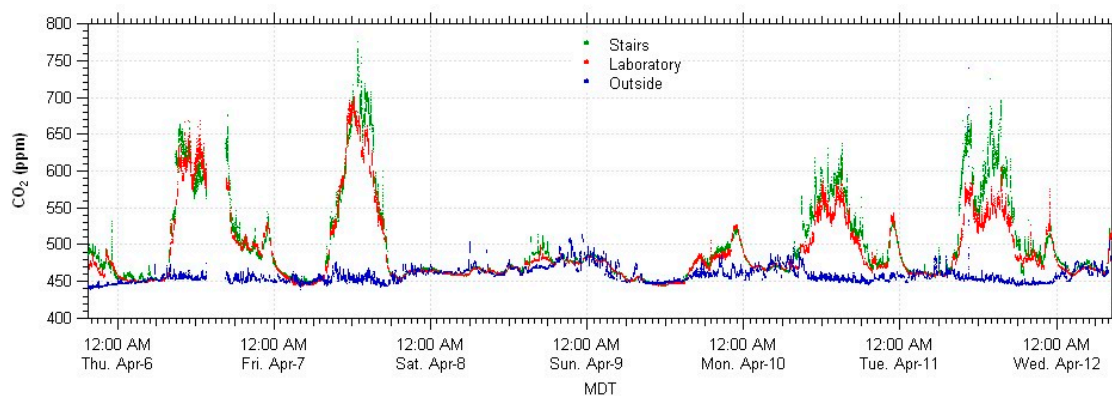

Figure S45. Spring 2006: University Building, Boulder.

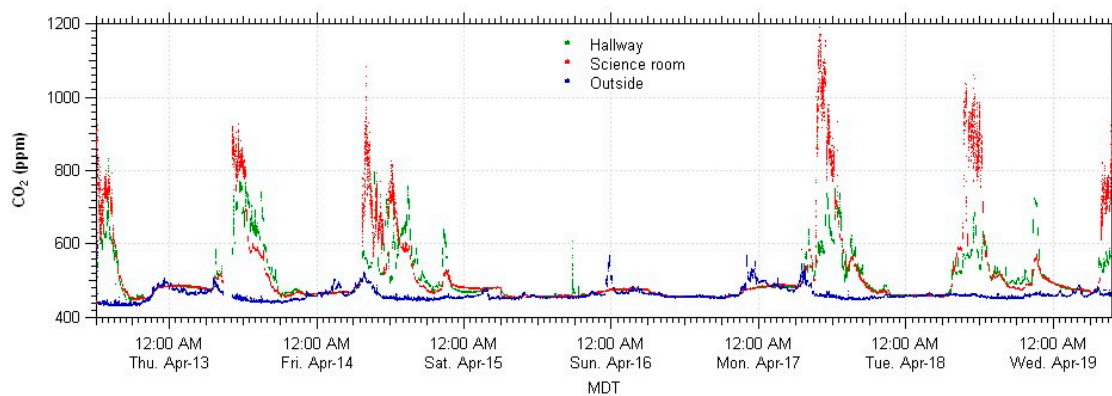

Figure S46. Spring 2006: Denver School.

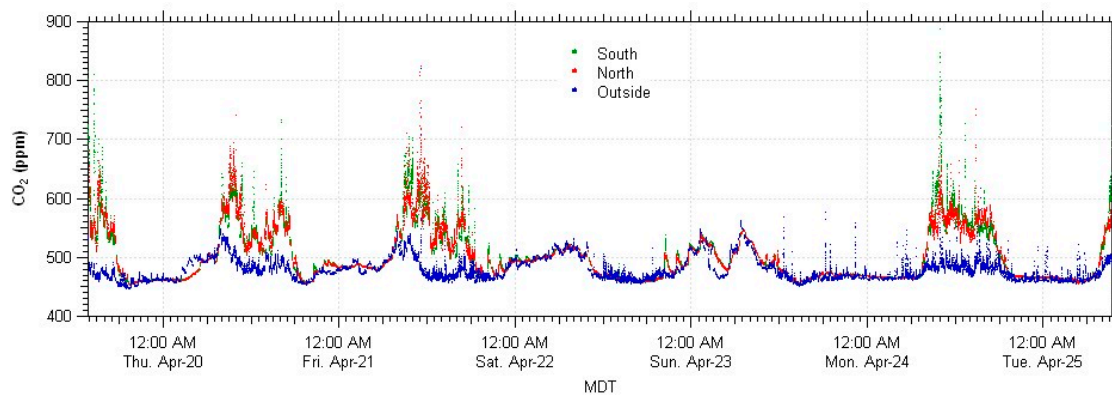

Figure S47. Spring 2006: Office building, Denver.

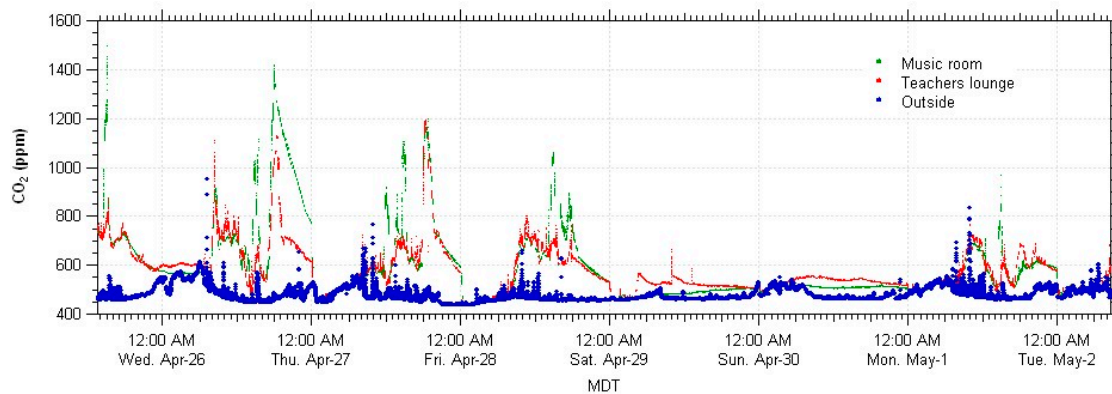

Figure S48. Spring 2006: Boulder School.

5. Section E: Tables of Average Lag Times and Standard Deviations

Table S9. Average (SD) lag times for each building.

| Building Type | Day Type       | Time of Day | Lag Times, min. |           |
|---------------|----------------|-------------|-----------------|-----------|
|               |                |             | Ultrafine       | Fine      |
| University    | Weekday        | All         | 63 (63)         | 72 (114)  |
|               |                | Day         | 9 (6)           | 15 (6)    |
|               |                | Night       | 33 (25)         | 30 (37)   |
|               | Weekend        | Day         | 100 (57)        | 56 (43)   |
|               |                | Night       | 68 (55)         | 88 (67)   |
|               | Denver School  | Weekday     | All             | 24 (17)   |
| Day           |                |             | 12 (0)          | 12 (6)    |
| Night         |                |             | 69 (130)        | 99 (184)  |
| Weekend       |                | Day         | 21 (20)         | 9 (0)     |
|               |                | Night       | 93 (170)        | 138 (236) |
| Office        |                | Weekday     | All             | 30 (7)    |
|               | Day            |             | 15 (6)          | 18 (10)   |
|               | Night          |             | 36 (14)         | 21 (34)   |
|               | Weekend        | Day         | 21 (6)          | 33 (6)    |
|               |                | Night       | 48 (26)         | 57 (17)   |
|               | Boulder School | Weekday     | All             | 56 (42)   |
| Day           |                |             | 8 (7)           | 24 (7)    |
| Night         |                |             | 44 (28)         | 32 (37)   |
| Weekend       |                | Day         | 48 (48)         | 44 (48)   |
|               |                | Night       | 44 (28)         | 104 (32)  |

All = All data from that building; Day = 6a m–8p m; Night = 8 pm–6 am.

Table S10. Average (SD) lag times for each season.

| Season  | Day Type | Time of Day | Lag Times, min. |           |
|---------|----------|-------------|-----------------|-----------|
|         |          |             | Ultrafine       | Fine      |
| Summer  | Weekday  | All         | 24 (12)         | 44 (35)   |
|         |          | Day         | 16 (7)          | 16 (7)    |
|         |          | Night       | 124 (121)       | 152 (195) |
|         | Weekend  | Day         | 64 (69)         | 28 (18)   |
|         |          | Night       | 152 (171)       | 212 (233) |
|         | Fall     | Weekday     | All             | 39 (18)   |
| Day     |          |             | 9 (6)           | 12 (10)   |
| Night   |          |             | 24 (26)         | 21 (42)   |
| Weekend |          | Day         | 56 (37)         | 40 (39)   |
|         |          | Night       | 44 (18)         | 44 (18)   |
| Winter  |          | Weekday     | All             | 51 (32)   |
|         | Day      |             | 9 (6)           | 6 (7)     |
|         | Night    |             | 39 (27)         | 27 (25)   |
|         | Weekend  | Day         | 12 (17)         | 12 (10)   |
|         |          | Night       | 39 (28)         | 30 (29)   |
|         | Spring   | Weekday     | All             | 51 (70)   |
| Day     |          |             | 12 (0)          | 12 (0)    |
| Night   |          |             | 15 (6)          | 27 (30)   |
| Weekend |          | Day         | 51 (48)         | 36 (49)   |
|         |          | Night       | 39 (62)         | 42 (69)   |

All = All data from that season; Day = 6 am–8 pm; Night = 8 pm–6 am.

Table S11. Average (SD) lag times for period of the week.

| Day Type | Time of Day | Lag Times, min. |          |
|----------|-------------|-----------------|----------|
|          |             | Ultrafine       | Fine     |
| Weekday  | All         | 42 (37)         | 49 (60)  |
|          | Day         | 11 (5)          | 11 (7)   |
|          | Night       | 46 (62)         | 50 (91)  |
| Weekend  | Day         | 44 (43)         | 28 (30)  |
|          | Night       | 64 (86)         | 75 (119) |
| Weekday  | Day         | 28 (47)         | 31 (68)  |
|          | Night       | 54 (69)         | 52 (90)  |
| Weekend  | Day         | 27 (34)         | 19 (23)  |
|          | Night       | 55 (75)         | 63 (106) |

All = All data; Day = 6 am–8 pm; Night = 8 pm–6 am.

Table S12. Seasonal Average (SD) lag times for university building only, by HVAC usage.

| Season | HVAC Usage | Lag Times, min. |         |
|--------|------------|-----------------|---------|
|        |            | Ultrafine       | Fine    |
| Summer | on         | 12              | 12      |
|        | off        | 48              | 60      |
| Fall   | on         | 24              | 12      |
|        | off        | 0               | 0       |
| Winter | on         | 12              | 24      |
|        | off        | 48              | 36      |
| Spring | on         | 12              | 0       |
|        | off        | 156             | 240     |
| Total  | on         | 15 (5)          | 12 (8)  |
|        | off        | 63 (57)         | 84 (93) |

Standard deviations in parenthesis, where applicable; Total = all seasons combined.

### 6. Section F: Outdoor Hour-Averaged AMS Chemical Data Plots

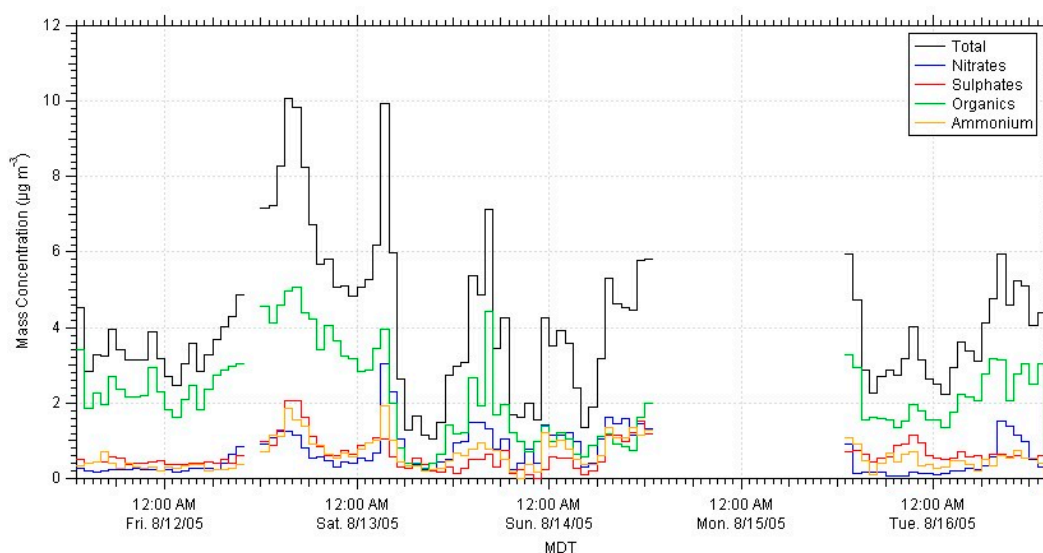

Figure S49. Summer 2005: Denver School.



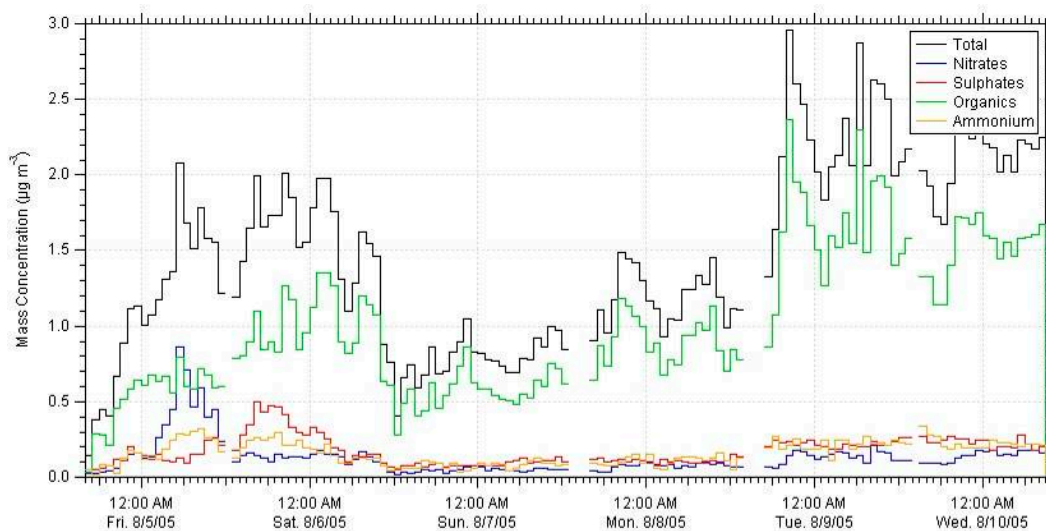

Figure S50. Summer 2005: University Building, Boulder.

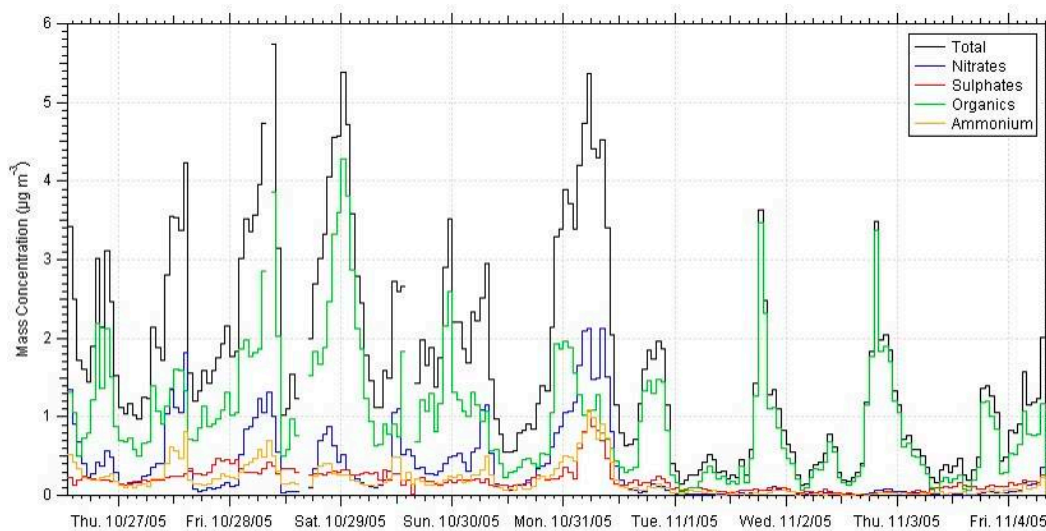

Figure S51. Fall 2005: Denver School.

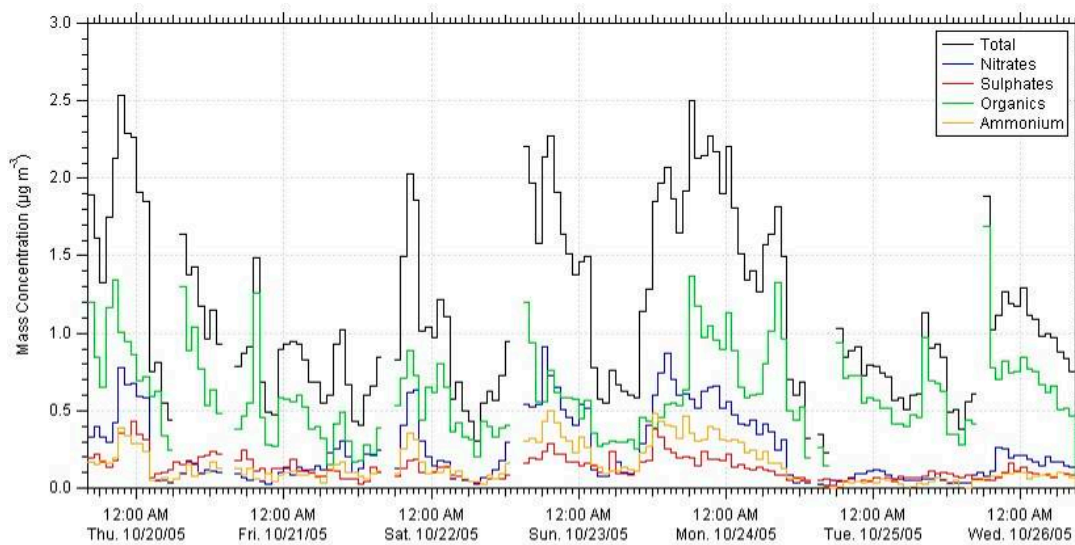

Figure S52. Fall 2005: University Building, Boulder.

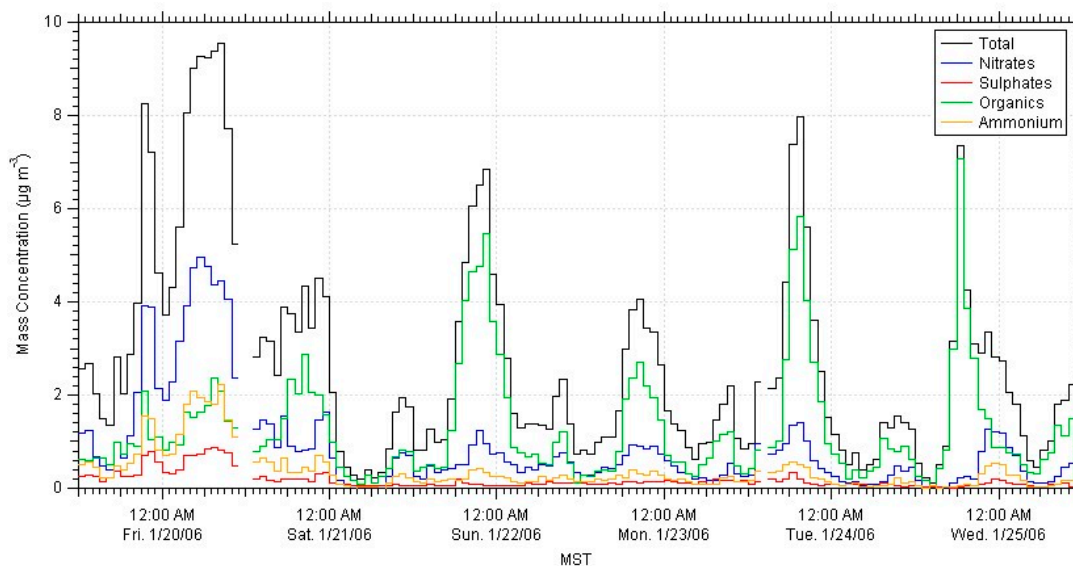

Figure S53. Winter 2006: Denver School.

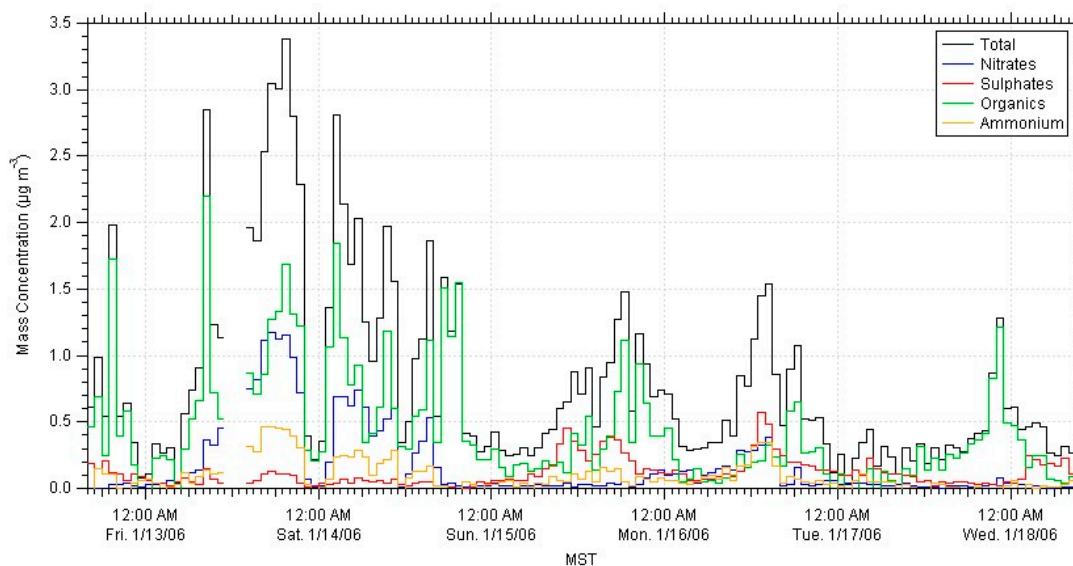

Figure S54. Winter 2006: University Building, Boulder.

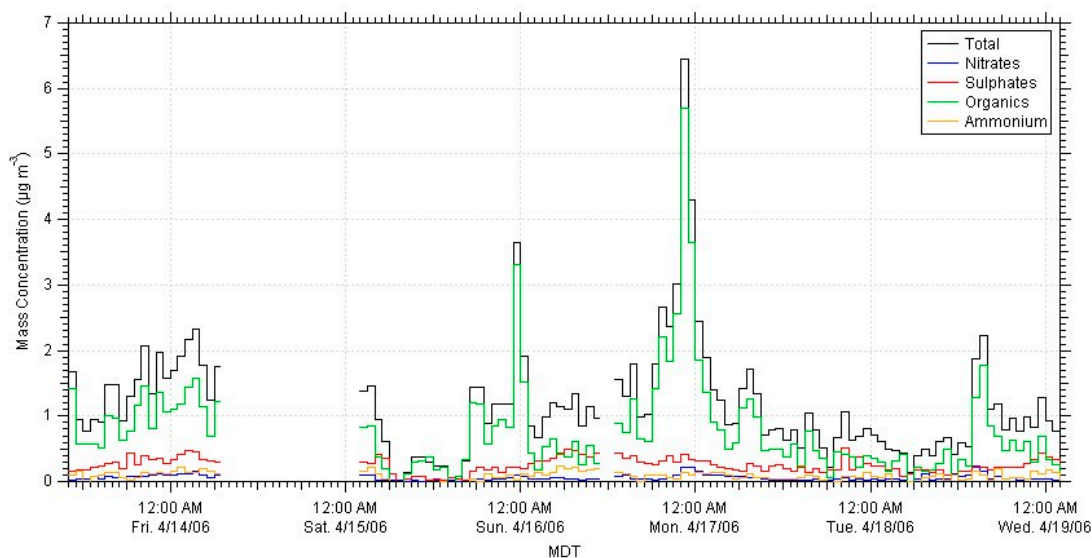

Figure S55. Spring 2006: Denver School.

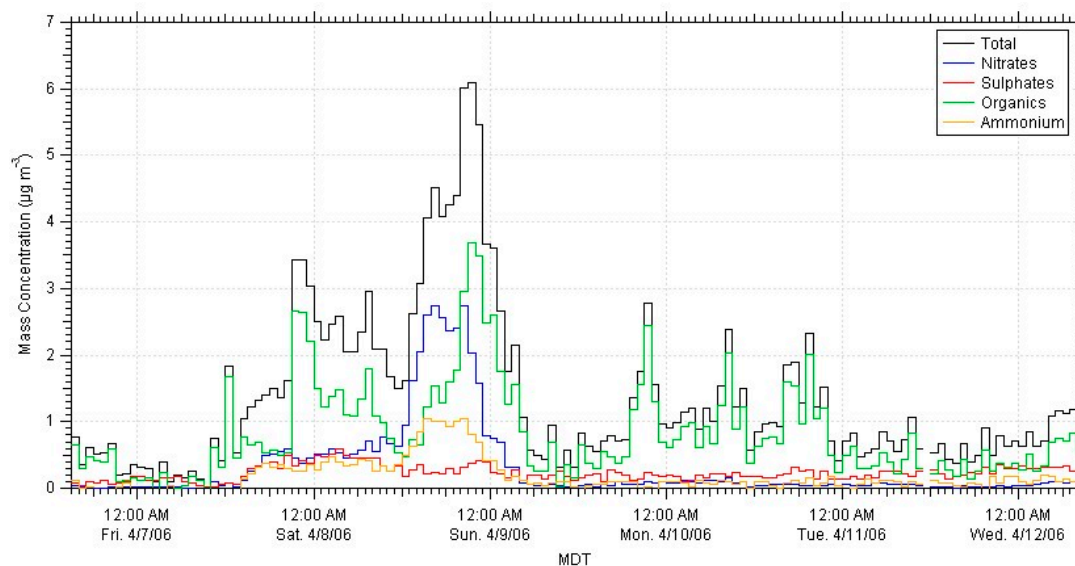

Figure S56. Spring 2006: University Building, Boulder.

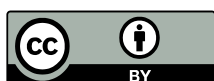

© 2017 by the authors; licensee MDPI, Basel, Switzerland. This article is an open access article distributed under the terms and conditions of the Creative Commons Attribution (CC-BY) license (<http://creativecommons.org/licenses/by/4.0/>).
